# Supplementary material for: Climate changes in interior semi-arid Spain from the last interglacial to the late Holocene
Source: Copernicus journal article supplement (doi:10.5194/cp-2019-16), 2019-02-12
Supplement: Supplementary file 1 [file cp-2019-16-supplement.zip]

**Climate changes in interior semi-arid Spain from the last interglacial to the late Holocene**

Dongyang Wei<sup>1,2</sup>, Penélope González-Sampériz<sup>3</sup>, Graciela Gil-Romera<sup>3</sup>, Sandy P. Harrison<sup>1</sup>, I. Colin Prentice<sup>4</sup>

1: Department of Geography and Environmental Science, University of Reading, Whiteknights, Reading, RG6 6AB, UK

2: Masters Programme in Ecosystem and Environmental Change, Department of Life Sciences, Imperial College London, Ascot, SL5 7PY, UK

3: Instituto Pirenaico de Ecología-CSIC, Avda. Montañana 1005, 50059 Zaragoza, Spain

4: AXA Chair Programme in Biosphere and Climate Impacts, Department of Life Sciences, Imperial College London, Ascot, SL5 7PY, UK

The supplementary information contains the following Figures and Tables:

SI Figure 1. The impact of removing Poaceae and Polypodiales from the taxon set on reconstructions of (a) mean temperature of the coldest month (MTCO, °C) and (b) growing degree days above a base level of 0° C (GDD<sub>0</sub>) during MIS4 and MIS5a. The red line (without P/P) is the reconstructed values once Poaceae and Polypodiales are removed. The comparison shows that removing these two taxa reduces anomalous peaks, where they were particularly abundant, but has little impact on the reconstructions for the rest of the samples.

SI Figure 2. Reconstructed mean temperature of the coldest month (MTCO, °C), growing degree days above a base level of 0°C (GDD<sub>0</sub>) and moisture index (the ratio of annual precipitation to annual potential evapotranspiration, MI). This plot differs from Figure 4 in the main text because the reconstructions for all of the samples are shown. The Marine Isotope Stages (MIS) and substages are shown by vertical dotted lines and labeled; we also show the transition interval between MIS6 and MIS5e. Red dots indicate the modern climate calculated from the elevation-corrected climate data from the Climate Research Unit (CRU) 2.0 data set.

SI Figure 3: Changes in [CO<sub>2</sub>] and their impact of reconstructed moisture index (the ratio of annual precipitation to annual potential evapotranspiration, MI). The upper panel shows the changes in [CO<sub>2</sub>], with a loess smoothing with a span of 0.1, and the lower panel shows reconstructed MI with (red line) and without (blue line) taking account of the [CO<sub>2</sub>] correction.

SI Figure 4: Identification of reconstructed climate changes during selected Dansgaard-Oeschger and Heinrich events. Reconstructed mean temperature of the coldest month (MTCO, °C), growing degree days above a base level of 0° C (GDD<sub>0</sub>) and moisture index (the ratio of annual precipitation to annual potential evapotranspiration, MI). Only samples with a Hill's N2 biodiversity index >2 are plotted. The Marine Isotope Stages (MIS) and substages are shown by vertical dotted lines and labeled; we also show the transition interval between MIS6 and MIS5e. Red dots indicate the modern climate calculated from the elevation-corrected climate data from the Climate Research Unit (CRU) 2.0 data set.

SI Table 1: Modern pollen surface samples from north, northeastern and eastern Spain included in the modern pollen data set, after taxonomic standardization and amalgamation.

SI Table 2: Allocation of pollen taxa in the modern data set to the amalgamated taxa used in the reconstructions. Note that this includes all of the 249 amalgamated taxa; some of these taxa were not used in WA-PLS because they occurred in less than 10 sites in the modern training data set.

SI Table 3: The results of randomisation *t*-test on the leave-one-out cross-validated predictions of the weighted averaging-partial least squares (WA-PLS) regression models for 196 taxa (including Poaceae and Polypodiales). Selected components are marked in bold.

SI Table 4: Reconstructed mean temperature of the coldest month (MTCO, °C), growing degree days above a base level of 0°C (GDD<sub>0</sub>) and moisture index (the ratio of annual precipitation to annual potential evapotranspiration, MI) for each of the samples. We give the depth and age for each sample. For the reconstructions of MI, we give values before and after the [CO<sub>2</sub>] correction.

SI Table 5: Definition of the Marine Isotope Stages (and sub-stages) boundaries used in our analyses.

SI Figure 1. The impact of removing Poaceae and Polypodiales from the taxon set on reconstructions of (a) mean temperature of the coldest month (MTCO, °C) and (b) growing degree days above a base level of 0° C (GDD<sub>0</sub>) during MIS4 and MIS5a. The red line (without P/P) is the reconstructed values once Poaceae and Polypodiales are removed. The comparison shows that removing these two taxa reduces anomalous peaks, where they were particularly abundant, but has little impact on the reconstructions for the rest of the samples.

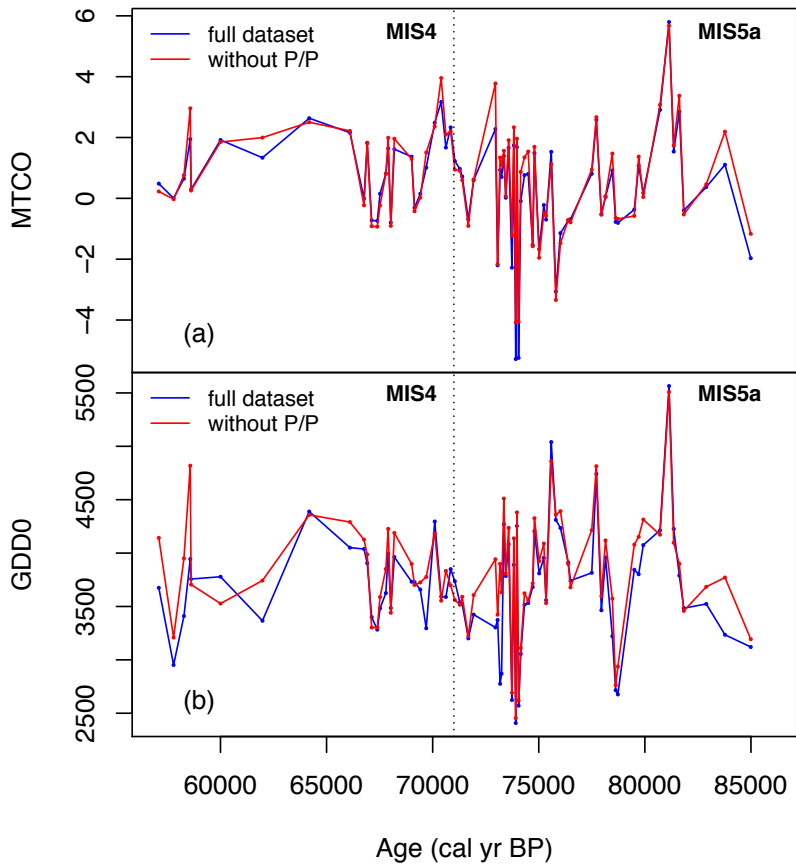

SI Figure 2. Reconstructed mean temperature of the coldest month (MTCO, °C), growing degree days above a base level of 0°C (GDD<sub>0</sub>) and moisture index (the ratio of annual precipitation to annual potential evapotranspiration, MI). This plot differs from Figure 4 in the main text because the reconstructions for all of the samples are shown. The Marine Isotope Stages (MIS) and substages are shown by vertical dotted lines and labeled; we also show the transition interval between MIS6 and MIS5e. Red dots indicate the modern climate calculated from the elevation-corrected climate data from the Climate Research Unit (CRU) 2.0 data set.

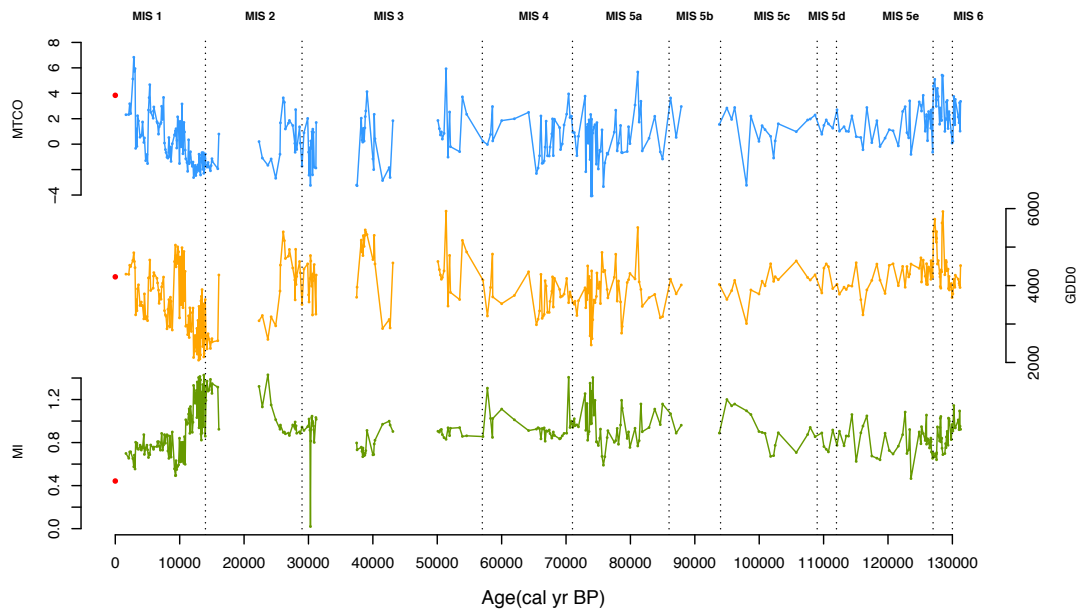

SI Figure 3: Changes in [CO<sub>2</sub>] and their impact of reconstructed moisture index (the ratio of annual precipitation to annual potential evapotranspiration, MI). The upper panel shows the changes in [CO<sub>2</sub>], with a loess smoothing with a span of 0.1, and the lower panel shows reconstructed MI with (red line) and without (blue line) taking account of the [CO<sub>2</sub>] correction.

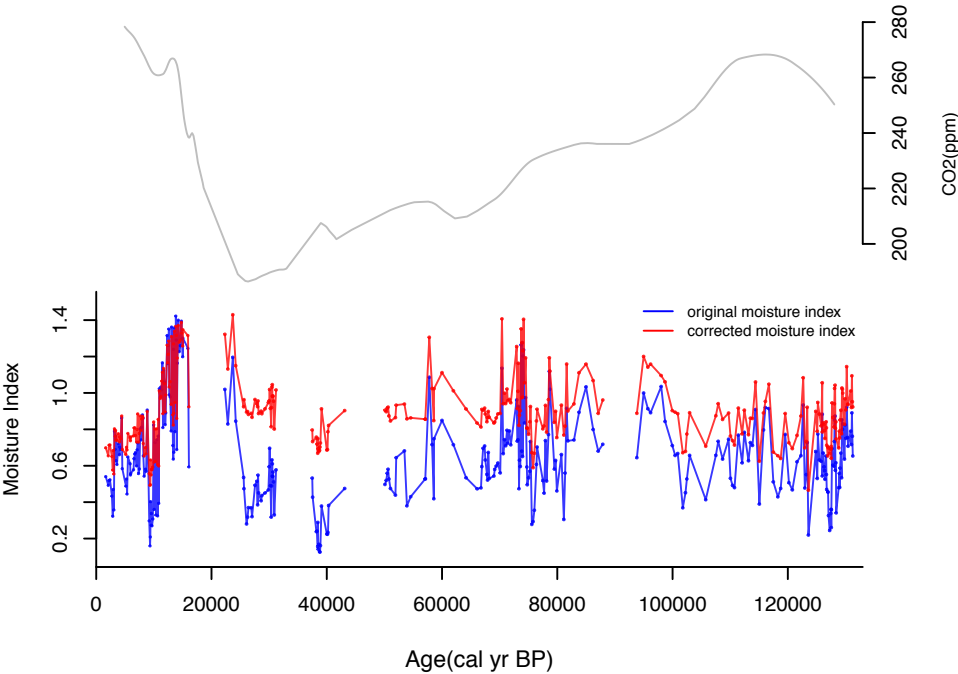

SI Figure 4: Identification of reconstructed climate changes during selected Dansgaard-Oeschger and Heinrich events. Reconstructed mean temperature of the coldest month (MTCO, °C), growing degree days above a base level of 0° C (GDD<sub>0</sub>) and moisture index (the ratio of annual precipitation to annual potential evapotranspiration, MI). Only samples with a Hill's N2 biodiversity index >2 are plotted. The Marine Isotope Stages (MIS) and substages are shown by vertical dotted lines and labeled; we also show the transition interval between MIS6 and MIS5e. Red dots indicate the modern climate calculated from the elevation-corrected climate data from the Climate Research Unit (CRU) 2.0 data set.

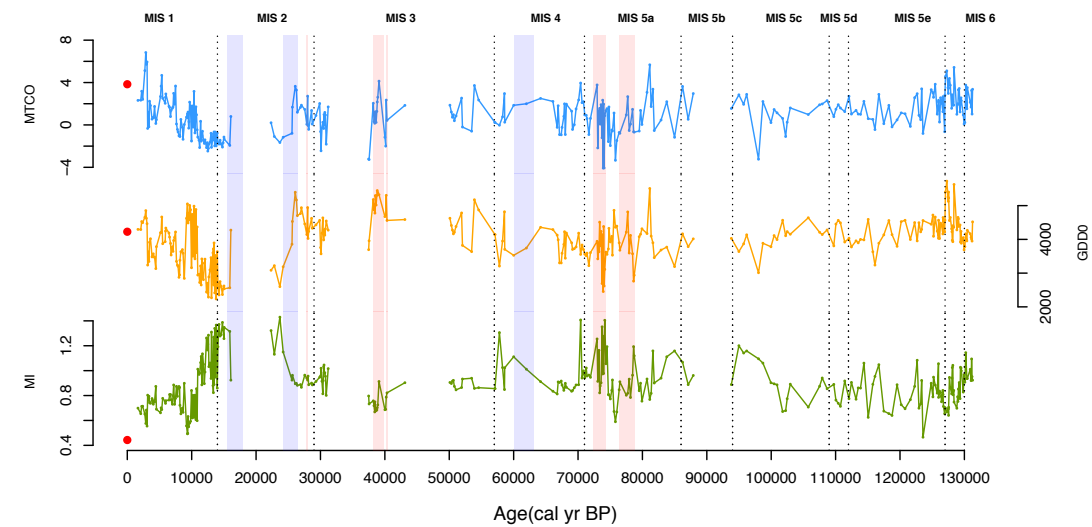

1099 SI Table 1: Modern pollen surface samples from north, northeastern and eastern Spain  
1100 included in the modern pollen data set, after taxonomic standardization and  
1101 amalgamation.  
1102  
1103 (provided as separate csv file)  
1104

1105 SI Table 2: Allocation of pollen taxa in the modern data set to the amalgamated taxa  
 1106 used in the reconstructions. Note that this includes all of the 249 amalgamated taxa;  
 1107 some of these taxa were not used in WA-PLS because they occurred in less than 10  
 1108 sites in the modern training data set.  
 1109

| Amalgamated taxon    | Pollen taxa included                                                                                                                                                                                                                                                                                                                                |
|----------------------|-----------------------------------------------------------------------------------------------------------------------------------------------------------------------------------------------------------------------------------------------------------------------------------------------------------------------------------------------------|
| <i>Abies</i>         | <i>Abies</i> , <i>Abies alba</i> , <i>Abies cilicica</i> , <i>Abies nordmanniana</i> ,<br><i>Abies pinsapo</i> subsp <i>marocana</i>                                                                                                                                                                                                                |
| Acanthaceae          | <i>Acanthus mollis</i>                                                                                                                                                                                                                                                                                                                              |
| <i>Acer</i>          | <i>Acer</i> , <i>Acer campestre</i> , <i>Acer campestre</i> type, <i>Acer</i><br><i>pseudoplatanus</i> , <i>Acer</i> type                                                                                                                                                                                                                           |
| <i>Aconitum</i>      | <i>Aconitum</i> , <i>Aconitum napellus</i> type, <i>Aconitum</i><br><i>septentrionale</i> , <i>Aconitum</i> type                                                                                                                                                                                                                                    |
| <i>Adonis</i>        | <i>Adonis</i> , <i>Adonis aestivalis</i> type, <i>Adonis</i> type, <i>Adonis</i><br><i>vernalis</i>                                                                                                                                                                                                                                                 |
| Adoxaceae            | <i>Adoxa</i> , <i>Adoxa moschatellina</i>                                                                                                                                                                                                                                                                                                           |
| <i>Aesculus</i>      | <i>Aesculus</i> , <i>Aesculus hippocastanum</i>                                                                                                                                                                                                                                                                                                     |
| <i>Ailanthus</i>     | <i>Ailanthus</i>                                                                                                                                                                                                                                                                                                                                    |
| Aizoaceae            | <i>Carpobrotus</i>                                                                                                                                                                                                                                                                                                                                  |
| <i>Alnus</i>         | <i>Alnus</i> , <i>Alnus alnobetula</i> subsp <i>fruticosa</i> , <i>Alnus</i><br><i>glutinosa</i> , <i>Alnus glutinosa</i> type, <i>Alnus glutinosa</i> / <i>Alnus</i><br><i>incana</i> , <i>Alnus incana</i> , <i>Alnus incana</i> type, <i>Alnus</i><br><i>incana</i> / <i>Alnus cordata</i> type, <i>Alnus non-viridis</i> , <i>Alnus</i><br>type |
| <i>Alnus viridis</i> | <i>Alnus viridis</i> , <i>Alnus viridis</i> subsp <i>fruticosa</i>                                                                                                                                                                                                                                                                                  |
| Amaranthaceae        | <i>Aellenia</i> type, Amaranthaceae, <i>Amaranthus</i> , <i>Atriplex</i><br><i>nudicaulis</i> , <i>Chenopodium</i> , <i>Chenopodium album</i> , <i>Noaea</i><br>type, <i>Nonea</i> , <i>Spinacia</i> type                                                                                                                                           |
| Amaryllidaceae       | Amaryllidaceae, <i>Narcissus</i>                                                                                                                                                                                                                                                                                                                    |
| Amygdaloideae        | Amygdaloideae, <i>Sorbus</i> / <i>Cotoneaster</i>                                                                                                                                                                                                                                                                                                   |
| Anacardiaceae        | Anacardiaceae                                                                                                                                                                                                                                                                                                                                       |
| Andromeda            | <i>Andromeda</i>                                                                                                                                                                                                                                                                                                                                    |
| Anemone              | <i>Anemone</i> , <i>Anemone nemorosa</i> , <i>Anemone nemorosa</i><br>type, <i>Anemone nemorosa</i> type/ <i>Hepatica nobilis</i> ,<br><i>Anemone nemorosa</i> / <i>Anemone ranunculoides</i> , <i>Anemone</i><br>type                                                                                                                              |



|                           |                                                                                                                                                                                                                                                                                                                                                                                                                                                                                                                                                                                                                                                                                                                                                                                                                                                                                                                                                                                                                                                                                                                                                                                                                                                                                                                                                                                                                                                                                                                                                                                                                                                                                                                                             |
|---------------------------|---------------------------------------------------------------------------------------------------------------------------------------------------------------------------------------------------------------------------------------------------------------------------------------------------------------------------------------------------------------------------------------------------------------------------------------------------------------------------------------------------------------------------------------------------------------------------------------------------------------------------------------------------------------------------------------------------------------------------------------------------------------------------------------------------------------------------------------------------------------------------------------------------------------------------------------------------------------------------------------------------------------------------------------------------------------------------------------------------------------------------------------------------------------------------------------------------------------------------------------------------------------------------------------------------------------------------------------------------------------------------------------------------------------------------------------------------------------------------------------------------------------------------------------------------------------------------------------------------------------------------------------------------------------------------------------------------------------------------------------------|
| Apiaceae                  | <i>Aegopodium</i> , <i>Aegopodium podagraria</i> , <i>Ammi</i> type, <i>Angelica</i> , <i>Angelica archangelica</i> , <i>Angelica</i> type, <i>Anisosciadium</i> type, <i>Anthriscus</i> , <i>Anthriscus sylvestris</i> , <i>Anthriscus sylvestris</i> type, <i>Anthriscus</i> type, Apiaceae, <i>Apium</i> type, <i>Apium/Berula</i> , <i>Astrantia</i> , <i>Astrantia</i> type, <i>Athamanta cretensis</i> , <i>Berula erecta</i> type, <i>Bunium</i> type, <i>Bupleurum</i> , <i>Bupleurum</i> type, <i>Carum carvi</i> , <i>Chaerophyllum</i> , <i>Chaerophyllum hirsutum</i> type, <i>Chaerophyllum</i> type, <i>Conopodium</i> , <i>Conopodium majus</i> , Daucaceae, <i>Daucus carota</i> , <i>Daucus carota</i> type, <i>Daucus</i> type, <i>Echinophora</i> , <i>Echinophora</i> type, <i>Eryngium</i> , <i>Eryngium ilicifolium</i> , <i>Eryngium</i> type, <i>Falcaria</i> type, <i>Ferula</i> type, <i>Heracleum</i> , <i>Heracleum laciniatum</i> type, <i>Heracleum sphondylium</i> , <i>Heracleum</i> type, <i>Laserpitium latifolium</i> type, <i>Laserpitium prutenicum</i> , <i>Ligusticum mutellina</i> , <i>Malabaila</i> , <i>Meum</i> , <i>Meum athamanticum</i> , <i>Neogaya simplex</i> type, <i>Oenanthe</i> , <i>Oenanthe</i> type, <i>Orlaya</i> , <i>Orlaya grandiflora</i> , <i>Pastinaca</i> type, <i>Peucedanum</i> , <i>Peucedanum ostruthium</i> , <i>Peucedanum</i> type, <i>Pimpinella</i> , <i>Pimpinella major</i> type, <i>Pimpinella</i> type, <i>Pleurospermum austriacum</i> , <i>Sanicula</i> , <i>Sanicula europaea</i> , <i>Sanicula</i> type, <i>Scandix</i> , <i>Seseli</i> type, <i>Smyrniium</i> type, <i>Torilis</i> , <i>Torilis arvensis</i> , <i>Torilis</i> type, <i>Turgenia</i> type |
| <i>Aquilegia</i>          | <i>Aquilegia</i> type                                                                                                                                                                                                                                                                                                                                                                                                                                                                                                                                                                                                                                                                                                                                                                                                                                                                                                                                                                                                                                                                                                                                                                                                                                                                                                                                                                                                                                                                                                                                                                                                                                                                                                                       |
| Araceae                   | Araceae                                                                                                                                                                                                                                                                                                                                                                                                                                                                                                                                                                                                                                                                                                                                                                                                                                                                                                                                                                                                                                                                                                                                                                                                                                                                                                                                                                                                                                                                                                                                                                                                                                                                                                                                     |
| <i>Arbutus</i>            | <i>Arbutus</i> , <i>Arbutus</i> type, <i>Arbutus unedo</i>                                                                                                                                                                                                                                                                                                                                                                                                                                                                                                                                                                                                                                                                                                                                                                                                                                                                                                                                                                                                                                                                                                                                                                                                                                                                                                                                                                                                                                                                                                                                                                                                                                                                                  |
| <i>Arctostaphylos</i>     | <i>Arctostaphylos</i> , <i>Arctostaphylos uva-ursi</i>                                                                                                                                                                                                                                                                                                                                                                                                                                                                                                                                                                                                                                                                                                                                                                                                                                                                                                                                                                                                                                                                                                                                                                                                                                                                                                                                                                                                                                                                                                                                                                                                                                                                                      |
| <i>Argania</i>            | <i>Argania spinosa</i>                                                                                                                                                                                                                                                                                                                                                                                                                                                                                                                                                                                                                                                                                                                                                                                                                                                                                                                                                                                                                                                                                                                                                                                                                                                                                                                                                                                                                                                                                                                                                                                                                                                                                                                      |
| Aristolochiaceae          | <i>Aristolochia</i>                                                                                                                                                                                                                                                                                                                                                                                                                                                                                                                                                                                                                                                                                                                                                                                                                                                                                                                                                                                                                                                                                                                                                                                                                                                                                                                                                                                                                                                                                                                                                                                                                                                                                                                         |
| <i>Artemisia</i>          | <i>Artemisia</i> , <i>Artemisia genipii/Artemisia mutellina</i> , <i>Artemisia herba-alba</i> type, <i>Artemisia</i> type, <i>Artemisia vulgaris</i> type                                                                                                                                                                                                                                                                                                                                                                                                                                                                                                                                                                                                                                                                                                                                                                                                                                                                                                                                                                                                                                                                                                                                                                                                                                                                                                                                                                                                                                                                                                                                                                                   |
| Asclepiadaceae            | Asclepiadaceae                                                                                                                                                                                                                                                                                                                                                                                                                                                                                                                                                                                                                                                                                                                                                                                                                                                                                                                                                                                                                                                                                                                                                                                                                                                                                                                                                                                                                                                                                                                                                                                                                                                                                                                              |
| Asparagaceae              | Asparagaceae, <i>Asparagus</i> , <i>Asparagus</i> type, <i>Convallaria</i> , <i>Maianthemum</i> , <i>Maianthemum bifolium</i> , <i>Maianthemum</i> type, <i>Muscari</i> , <i>Ornithogalum</i> type, <i>Polygonatum</i> , <i>Scilla</i> type                                                                                                                                                                                                                                                                                                                                                                                                                                                                                                                                                                                                                                                                                                                                                                                                                                                                                                                                                                                                                                                                                                                                                                                                                                                                                                                                                                                                                                                                                                 |
| Asphodelaceae             | <i>Eremurus</i>                                                                                                                                                                                                                                                                                                                                                                                                                                                                                                                                                                                                                                                                                                                                                                                                                                                                                                                                                                                                                                                                                                                                                                                                                                                                                                                                                                                                                                                                                                                                                                                                                                                                                                                             |
| Asteraceae                | Asteraceae                                                                                                                                                                                                                                                                                                                                                                                                                                                                                                                                                                                                                                                                                                                                                                                                                                                                                                                                                                                                                                                                                                                                                                                                                                                                                                                                                                                                                                                                                                                                                                                                                                                                                                                                  |
| Asteraceae (Liguliflorae) | Asteraceae (Liguliflorae)                                                                                                                                                                                                                                                                                                                                                                                                                                                                                                                                                                                                                                                                                                                                                                                                                                                                                                                                                                                                                                                                                                                                                                                                                                                                                                                                                                                                                                                                                                                                                                                                                                                                                                                   |

|                              |                                                                                                                                                                                                                                                                                                                                                                                                                                                                                                                                                                                                                                                                                                                                                                                                                                                                                                                                                                                                                                                                                                                                                                                                                                                                      |
|------------------------------|----------------------------------------------------------------------------------------------------------------------------------------------------------------------------------------------------------------------------------------------------------------------------------------------------------------------------------------------------------------------------------------------------------------------------------------------------------------------------------------------------------------------------------------------------------------------------------------------------------------------------------------------------------------------------------------------------------------------------------------------------------------------------------------------------------------------------------------------------------------------------------------------------------------------------------------------------------------------------------------------------------------------------------------------------------------------------------------------------------------------------------------------------------------------------------------------------------------------------------------------------------------------|
| Asteroideae                  | <i>Achillea</i> , <i>Achillea</i> type, <i>Achillea/Anthemis</i> type, <i>Achillea/Aster</i> , <i>Achillea/Aster</i> type, <i>Adenostyles</i> type, <i>Ambrosia</i> , <i>Ambrosia artemisiifolia</i> type, <i>Ambrosia</i> type, <i>Ambrosia/Xanthium</i> , <i>Antennaria</i> , <i>Antennaria</i> type, <i>Anthemis</i> , <i>Anthemis</i> type, <i>Arnica montana</i> , <i>Aster</i> , <i>Aster bellidiastrum</i> , <i>Aster</i> type, <i>Asteroideae</i> , <i>Bellis</i> , <i>Bellis</i> type, <i>Bidens</i> , <i>Bidens</i> type, <i>Calendula</i> , <i>Calendula</i> type, <i>Chrysanthemum alpinum</i> , <i>Doronicum</i> , <i>Erigeron</i> , <i>Eupatorium</i> , <i>Eupatorium</i> type, <i>Evax</i> , <i>Filago</i> type, <i>Gnaphalium</i> , <i>Gnaphalium</i> type, <i>Helianthus</i> , <i>Helianthus</i> type, <i>Homogyne</i> , <i>Homogyne alpina</i> , <i>Inula</i> , <i>Inula</i> type, <i>Matricaria</i> type, <i>Petasites</i> , <i>Petasites</i> type, <i>Senecio</i> , <i>Senecio</i> type, <i>Solidago</i> , <i>Solidago</i> type, <i>Solidago virgaurea</i> type, <i>Tussilago farfara</i> , <i>Tussilago</i> type, <i>Xanthium</i> , <i>Xanthium spinosum</i> , <i>Xanthium spinosum</i> type, <i>Xanthium strumarium</i> , <i>Xanthium</i> type |
| <i>Astragalus</i>            | <i>Astragalus</i> , <i>Astragalus alpinus</i> type, <i>Astragalus</i> type                                                                                                                                                                                                                                                                                                                                                                                                                                                                                                                                                                                                                                                                                                                                                                                                                                                                                                                                                                                                                                                                                                                                                                                           |
| Berberidaceae                | Berberidaceae, <i>Leontice leontopetalum</i>                                                                                                                                                                                                                                                                                                                                                                                                                                                                                                                                                                                                                                                                                                                                                                                                                                                                                                                                                                                                                                                                                                                                                                                                                         |
| <i>Berberis</i>              | <i>Berberis</i> , <i>Berberis</i> , <i>Berberis vulgaris</i>                                                                                                                                                                                                                                                                                                                                                                                                                                                                                                                                                                                                                                                                                                                                                                                                                                                                                                                                                                                                                                                                                                                                                                                                         |
| <i>Betula</i>                | <i>Betula</i> , <i>Betula alba</i> , <i>Betula alba</i> type, <i>Betula pendula</i> , <i>Betula pendula/Betula pubescens</i> , <i>Betula pubescens</i> , <i>Betula pubescens</i> type, <i>Betula sect. albae</i> , <i>Betula tortuosa</i> , <i>Betula</i> type                                                                                                                                                                                                                                                                                                                                                                                                                                                                                                                                                                                                                                                                                                                                                                                                                                                                                                                                                                                                       |
| <i>Betula (Chamaebetula)</i> | <i>Betula fruticosa</i> , <i>Betula humilis</i> , <i>Betula humilis/Betula nana</i> , <i>Betula nana</i> , <i>Betula nana</i> type, <i>Betula sect. fruticosae</i> , <i>Betula sect. nanae</i>                                                                                                                                                                                                                                                                                                                                                                                                                                                                                                                                                                                                                                                                                                                                                                                                                                                                                                                                                                                                                                                                       |
| Boraginaceae                 | <i>Alkanna</i> , <i>Alkanna</i> type, <i>Anchusa</i> , <i>Anchusa arvensis</i> , <i>Anchusa</i> type, <i>Arnebia</i> type, Boraginaceae, <i>Borago officinalis</i> , <i>Cerinthe</i> , <i>Cerinthe minor</i> , <i>Cerinthe</i> type, <i>Cynoglossum creticum</i> , <i>Echium</i> , <i>Echium</i> type, <i>Echium vulgare</i> , <i>Heliotropium</i> , <i>Heliotropium</i> type, <i>Lithospermum</i> , <i>Lithospermum officinale</i> type, <i>Myosotis</i> , <i>Myosotis arvensis</i> type, <i>Myosotis</i> type, <i>Omphalodes</i> type, <i>Onosma</i> , <i>Onosma</i> type, <i>Pulmonaria</i> , <i>Pulmonaria</i> type, <i>Symphytum</i> , <i>Symphytum</i> type                                                                                                                                                                                                                                                                                                                                                                                                                                                                                                                                                                                                    |
| Brassicaceae                 | <i>Arabidopsis</i> , <i>Barbarea</i> type, <i>Brassica</i> , <i>Brassica</i> type, Brassicaceae, <i>Capsella bursa-pastoris</i> type, <i>Capsella</i> type, <i>Cardamine</i> , <i>Cardamine pratensis</i> type, <i>Cardamine</i> type, <i>Descurainia</i> , <i>Draba</i> , <i>Draba</i> type, <i>Hornungia</i> type, <i>Matthiola</i> , <i>Sinapis</i> , <i>Sinapis</i> type                                                                                                                                                                                                                                                                                                                                                                                                                                                                                                                                                                                                                                                                                                                                                                                                                                                                                         |
| <i>Bruckenthalia</i>         | <i>Bruckenthalia</i>                                                                                                                                                                                                                                                                                                                                                                                                                                                                                                                                                                                                                                                                                                                                                                                                                                                                                                                                                                                                                                                                                                                                                                                                                                                 |
| <i>Buxus</i>                 | <i>Buxus</i> , <i>Buxus sempervirens</i>                                                                                                                                                                                                                                                                                                                                                                                                                                                                                                                                                                                                                                                                                                                                                                                                                                                                                                                                                                                                                                                                                                                                                                                                                             |
| <i>Calluna</i>               | <i>Calluna</i> , <i>Calluna</i> type, <i>Calluna vulgaris</i>                                                                                                                                                                                                                                                                                                                                                                                                                                                                                                                                                                                                                                                                                                                                                                                                                                                                                                                                                                                                                                                                                                                                                                                                        |
| Campanulaceae                | <i>Campanula</i> , <i>Campanula</i> type, Campanulaceae, <i>Jasione</i> , <i>Jasione montana</i> , <i>Jasione</i> type, <i>Legousia</i> , <i>Lobelia</i> , <i>Lobelia dortmanna</i> , <i>Lobelia</i> type, <i>Phyteuma</i> , <i>Phyteuma</i> type                                                                                                                                                                                                                                                                                                                                                                                                                                                                                                                                                                                                                                                                                                                                                                                                                                                                                                                                                                                                                    |
| Capparaceae                  | Capparidaceae, <i>Capparis</i> , <i>Capparis spinosa</i> , <i>Capparis</i> type                                                                                                                                                                                                                                                                                                                                                                                                                                                                                                                                                                                                                                                                                                                                                                                                                                                                                                                                                                                                                                                                                                                                                                                      |

|                                   |                                                                                                                                                                                                                                                                                                                                                                                                                                                                                                                                                                                                                                                                                                                                                                                                                                                                                                                                                                                                                                                                                   |
|-----------------------------------|-----------------------------------------------------------------------------------------------------------------------------------------------------------------------------------------------------------------------------------------------------------------------------------------------------------------------------------------------------------------------------------------------------------------------------------------------------------------------------------------------------------------------------------------------------------------------------------------------------------------------------------------------------------------------------------------------------------------------------------------------------------------------------------------------------------------------------------------------------------------------------------------------------------------------------------------------------------------------------------------------------------------------------------------------------------------------------------|
| Caprifoliaceae                    | Caprifoliaceae, Dipsacaceae, <i>Dipsacus</i> , <i>Dipsacus fullonum</i> type, <i>Dipsacus</i> type, <i>Knautia</i> , <i>Knautia arvensis</i> , <i>Knautia</i> type, <i>Patrinia</i> , <i>Scabiosa</i> , <i>Scabiosa columbaria</i> type, <i>Scabiosa rotata</i> type, <i>Scabiosa</i> type, <i>Scabiosa/Succisa</i> type                                                                                                                                                                                                                                                                                                                                                                                                                                                                                                                                                                                                                                                                                                                                                          |
| <i>Caragana</i>                   | <i>Caragana</i>                                                                                                                                                                                                                                                                                                                                                                                                                                                                                                                                                                                                                                                                                                                                                                                                                                                                                                                                                                                                                                                                   |
| Carduoideae                       | <i>Arctium</i> , <i>Arctium</i> type, <i>Arctium/Jurinea</i> , Carduoideae, <i>Carduus</i> , <i>Carduus</i> type, <i>Carlina</i> , <i>Carlina</i> type, <i>Carthamus</i> , <i>Centaurea</i> , <i>Centaurea collina</i> , <i>Centaurea collina</i> type, <i>Centaurea cyanus</i> , <i>Centaurea cyanus</i> type, <i>Centaurea depressa</i> type, <i>Centaurea diffusa</i> , <i>Centaurea jacea</i> , <i>Centaurea jacea</i> type, <i>Centaurea montana</i> , <i>Centaurea montana</i> type, <i>Centaurea nigra</i> , <i>Centaurea nigra</i> type, <i>Centaurea rhenana</i> type, <i>Centaurea scabiosa</i> , <i>Centaurea scabiosa</i> type, <i>Centaurea solstitialis</i> , <i>Centaurea solstitialis</i> type, <i>Centaurea</i> type, <i>Cirsium</i> , <i>Cirsium</i> type, <i>Cirsium/Carduus</i> , <i>Cirsium/Carduus</i> type, <i>Cirsium/Gundelia</i> , <i>Cousinia</i> , <i>Echinops</i> , <i>Echinops ritro</i> , <i>Jurinea</i> type, <i>Onopordum</i> type, <i>Saussurea</i> , <i>Saussurea alpina</i> , <i>Saussurea</i> type, <i>Serratula</i> , <i>Serratula</i> type |
| <i>Carpinus betulus</i>           | <i>Carpinus</i> , <i>Carpinus betulus</i> , <i>Carpinus betulus</i> type, <i>Carpinus</i> type                                                                                                                                                                                                                                                                                                                                                                                                                                                                                                                                                                                                                                                                                                                                                                                                                                                                                                                                                                                    |
| <i>Carpinus orientalis/Ostrya</i> | <i>Carpinus orientalis</i> , <i>Carpinus orientalis</i> type, <i>Carpinus orientalis/Ostrya</i> , <i>Carpinus orientalis/Ostrya carpinifolia</i> , <i>Carpinus orientalis/Ostrya carpinifolia</i> type, <i>Carpinus/Ostrya</i> , <i>Ostrya</i> , <i>Ostrya</i> type                                                                                                                                                                                                                                                                                                                                                                                                                                                                                                                                                                                                                                                                                                                                                                                                               |

|                     |                                                                                                                                                                                                                                                                                                                                                                                                                                                                                                                                                                                                                                                                                                                                                                                                                                                                                                                                                                                                                                                                                                                                                                                                                                                                                                                                                                                                                                                                                                                                                                                                                                                                                                                                                                                                                                                                                                                                                                         |
|---------------------|-------------------------------------------------------------------------------------------------------------------------------------------------------------------------------------------------------------------------------------------------------------------------------------------------------------------------------------------------------------------------------------------------------------------------------------------------------------------------------------------------------------------------------------------------------------------------------------------------------------------------------------------------------------------------------------------------------------------------------------------------------------------------------------------------------------------------------------------------------------------------------------------------------------------------------------------------------------------------------------------------------------------------------------------------------------------------------------------------------------------------------------------------------------------------------------------------------------------------------------------------------------------------------------------------------------------------------------------------------------------------------------------------------------------------------------------------------------------------------------------------------------------------------------------------------------------------------------------------------------------------------------------------------------------------------------------------------------------------------------------------------------------------------------------------------------------------------------------------------------------------------------------------------------------------------------------------------------------------|
| Caryophyllaceae     | <i>Agrostemma</i> , <i>Agrostemma githago</i> , <i>Arenaria</i> , <i>Arenaria</i> type, Caryophyllaceae, Caryophyllaceae subfam. Silenoideae, <i>Cerastium</i> , <i>Cerastium alpinum</i> type, <i>Cerastium arvense</i> type, <i>Cerastium cerastioides</i> type, <i>Cerastium fontanum</i> type, <i>Cerastium</i> type, <i>Cerastium/Stellaria</i> type, <i>Corrigiola</i> , <i>Dianthus</i> , <i>Dianthus superbus</i> type, <i>Dianthus</i> type, <i>Frankenia</i> , <i>Frankenia hirsuta</i> type, <i>Gypsophila</i> , <i>Gypsophila fastigiata</i> , <i>Gypsophila repens</i> type, <i>Gypsophila</i> type, <i>Herniaria</i> , <i>Herniaria glabra</i> , <i>Herniaria</i> type, <i>Herniaria/Paronychia</i> , <i>Illecebrum</i> , <i>Loeflingia</i> , <i>Lychnis</i> , <i>Lychnis flos-cuculi</i> , <i>Lychnis flos-cuculi</i> type, <i>Lychnis</i> type, <i>Lychnis viscaria</i> type, <i>Minuartia</i> , <i>Minuartia rubra</i> type, <i>Minuartia</i> type, <i>Minuartia verna</i> type, <i>Moehringia</i> type, <i>Paronychia</i> , <i>Paronychia</i> type, <i>Polycarpon</i> , <i>Sagina</i> , <i>Sagina procumbens</i> , <i>Sagina</i> type, <i>Saponaria</i> , <i>Scleranthus</i> , <i>Scleranthus annuus</i> , <i>Scleranthus perennis</i> , <i>Scleranthus</i> type, Silenaceae, <i>Silene</i> , <i>Silene acaulis</i> , <i>Silene acaulis</i> type, <i>Silene alba</i> type, <i>Silene dioica</i> type, <i>Silene latifolia</i> , <i>Silene rupestris</i> , <i>Silene</i> type, <i>Silene vulgaris</i> type, <i>Spergula</i> , <i>Spergula arvensis</i> , <i>Spergula</i> type, <i>Spergula/Spergularia</i> , <i>Spergularia</i> , <i>Spergularia</i> type, <i>Stellaria</i> , <i>Stellaria holostea</i> , <i>Stellaria holostea</i> type, <i>Stellaria nemorum</i> , <i>Stellaria nemorum</i> type, <i>Stellaria palustris</i> , <i>Stellaria</i> type, <i>Succisa</i> , <i>Succisa pratensis</i> , <i>Succisa pratensis</i> type, <i>Succisa</i> type |
| <i>Cassiope</i>     | <i>Cassiope</i> , <i>Cassiope</i> type                                                                                                                                                                                                                                                                                                                                                                                                                                                                                                                                                                                                                                                                                                                                                                                                                                                                                                                                                                                                                                                                                                                                                                                                                                                                                                                                                                                                                                                                                                                                                                                                                                                                                                                                                                                                                                                                                                                                  |
| <i>Castanea</i>     | <i>Castanea</i> , <i>Castanea sativa</i> , <i>Castanea</i> type                                                                                                                                                                                                                                                                                                                                                                                                                                                                                                                                                                                                                                                                                                                                                                                                                                                                                                                                                                                                                                                                                                                                                                                                                                                                                                                                                                                                                                                                                                                                                                                                                                                                                                                                                                                                                                                                                                         |
| <i>Cedrus</i>       | <i>Cedrus</i> , <i>Cedrus atlantica</i> , <i>Cedrus atlantica</i> type, <i>Cedrus libani</i>                                                                                                                                                                                                                                                                                                                                                                                                                                                                                                                                                                                                                                                                                                                                                                                                                                                                                                                                                                                                                                                                                                                                                                                                                                                                                                                                                                                                                                                                                                                                                                                                                                                                                                                                                                                                                                                                            |
| Celastraceae        | Celastraceae, <i>Parnassia</i> , <i>Parnassia palustris</i>                                                                                                                                                                                                                                                                                                                                                                                                                                                                                                                                                                                                                                                                                                                                                                                                                                                                                                                                                                                                                                                                                                                                                                                                                                                                                                                                                                                                                                                                                                                                                                                                                                                                                                                                                                                                                                                                                                             |
| <i>Celtis</i>       | <i>Celtis</i> , <i>Celtis australis</i>                                                                                                                                                                                                                                                                                                                                                                                                                                                                                                                                                                                                                                                                                                                                                                                                                                                                                                                                                                                                                                                                                                                                                                                                                                                                                                                                                                                                                                                                                                                                                                                                                                                                                                                                                                                                                                                                                                                                 |
| <i>Ceratonia</i>    | <i>Ceratonia</i> , <i>Ceratonia siliqua</i> , <i>Ceratonia</i> type                                                                                                                                                                                                                                                                                                                                                                                                                                                                                                                                                                                                                                                                                                                                                                                                                                                                                                                                                                                                                                                                                                                                                                                                                                                                                                                                                                                                                                                                                                                                                                                                                                                                                                                                                                                                                                                                                                     |
| <i>Cercis</i>       | <i>Cercis siliquastrum</i>                                                                                                                                                                                                                                                                                                                                                                                                                                                                                                                                                                                                                                                                                                                                                                                                                                                                                                                                                                                                                                                                                                                                                                                                                                                                                                                                                                                                                                                                                                                                                                                                                                                                                                                                                                                                                                                                                                                                              |
| <i>Chamaedaphne</i> | <i>Chamaedaphne</i> , <i>Chamaedaphne calyculata</i>                                                                                                                                                                                                                                                                                                                                                                                                                                                                                                                                                                                                                                                                                                                                                                                                                                                                                                                                                                                                                                                                                                                                                                                                                                                                                                                                                                                                                                                                                                                                                                                                                                                                                                                                                                                                                                                                                                                    |
| <i>Chamaerops</i>   | <i>Chamaerops</i>                                                                                                                                                                                                                                                                                                                                                                                                                                                                                                                                                                                                                                                                                                                                                                                                                                                                                                                                                                                                                                                                                                                                                                                                                                                                                                                                                                                                                                                                                                                                                                                                                                                                                                                                                                                                                                                                                                                                                       |
| <i>Chimaphila</i>   | <i>Chimaphila umbellata</i>                                                                                                                                                                                                                                                                                                                                                                                                                                                                                                                                                                                                                                                                                                                                                                                                                                                                                                                                                                                                                                                                                                                                                                                                                                                                                                                                                                                                                                                                                                                                                                                                                                                                                                                                                                                                                                                                                                                                             |
| Cichorioideae       | Cichorioideae, <i>Cichorium</i> , <i>Cichorium intybus</i> type, <i>Cichorium</i> type, <i>Crepis</i> , <i>Crepis aurea</i> , <i>Crepis</i> type, <i>Hieracium</i> type, <i>Lactuca</i> , <i>Lactuca sativa</i> type, <i>Lactuca</i> type, <i>Leontodon helveticus</i> , <i>Leontodon</i> type, <i>Scorzonera humilis</i> type, <i>Scorzonera</i> type, <i>Sonchus</i> type, <i>Taraxacum</i> , <i>Taraxacum</i> type                                                                                                                                                                                                                                                                                                                                                                                                                                                                                                                                                                                                                                                                                                                                                                                                                                                                                                                                                                                                                                                                                                                                                                                                                                                                                                                                                                                                                                                                                                                                                   |
| <i>Cimicifuga</i>   | <i>Cimicifuga foetida</i>                                                                                                                                                                                                                                                                                                                                                                                                                                                                                                                                                                                                                                                                                                                                                                                                                                                                                                                                                                                                                                                                                                                                                                                                                                                                                                                                                                                                                                                                                                                                                                                                                                                                                                                                                                                                                                                                                                                                               |
| Cistaceae           | Cistaceae, <i>Halimium/Tuberaria</i> , <i>Tuberaria</i>                                                                                                                                                                                                                                                                                                                                                                                                                                                                                                                                                                                                                                                                                                                                                                                                                                                                                                                                                                                                                                                                                                                                                                                                                                                                                                                                                                                                                                                                                                                                                                                                                                                                                                                                                                                                                                                                                                                 |
| <i>Cistus</i>       | <i>Cistus</i> , <i>Cistus albidus</i> type, <i>Cistus incanus</i> type, <i>Cistus ladanifer</i> , <i>Cistus ladanifer</i> type, <i>Cistus monspeliensis</i> , <i>Cistus monspeliensis</i> type, <i>Cistus populifolius</i> type, <i>Cistus salvifolius</i> , <i>Cistus salviifolius</i> type, <i>Cistus</i> type, <i>Cistus villosus</i> type                                                                                                                                                                                                                                                                                                                                                                                                                                                                                                                                                                                                                                                                                                                                                                                                                                                                                                                                                                                                                                                                                                                                                                                                                                                                                                                                                                                                                                                                                                                                                                                                                           |

|                    |                                                                                                                                                                                                                                                                                                                                                                                                                                                                                                                      |
|--------------------|----------------------------------------------------------------------------------------------------------------------------------------------------------------------------------------------------------------------------------------------------------------------------------------------------------------------------------------------------------------------------------------------------------------------------------------------------------------------------------------------------------------------|
| <i>Clematis</i>    | <i>Clematis</i> , <i>Clematis</i> type, <i>Clematis vitalba</i> type                                                                                                                                                                                                                                                                                                                                                                                                                                                 |
| <i>Clethra</i>     | <i>Clethra</i>                                                                                                                                                                                                                                                                                                                                                                                                                                                                                                       |
| Clusiaceae         | <i>Guttiferae</i>                                                                                                                                                                                                                                                                                                                                                                                                                                                                                                    |
| Colchicaceae       | <i>Colchicum</i> , <i>Colchicum autumnale</i> type, <i>Colchicum</i> type, <i>Colchicum/Merendera</i> , <i>Merendera</i>                                                                                                                                                                                                                                                                                                                                                                                             |
| <i>Colutea</i>     | <i>Colutea</i>                                                                                                                                                                                                                                                                                                                                                                                                                                                                                                       |
| <i>Consolida</i>   | <i>Consolida</i> type                                                                                                                                                                                                                                                                                                                                                                                                                                                                                                |
| Convolvulaceae     | <i>Calystegia</i> , <i>Calystegia sepium</i> , Convolvulaceae, <i>Convolvulus</i> , <i>Convolvulus arvensis</i> , <i>Convolvulus arvensis</i> type, <i>Corema album</i> type, <i>Cuscuta</i> , <i>Cuscuta europaea</i> type                                                                                                                                                                                                                                                                                          |
| <i>Coriaria</i>    | <i>Coriaria</i> , <i>Coriaria myrtifolia</i>                                                                                                                                                                                                                                                                                                                                                                                                                                                                         |
| <i>Cornus</i>      | Cornaceae, <i>Cornus</i> , <i>Cornus mas</i> , <i>Cornus mas/Cornus suecica</i> , <i>Cornus sanguinea</i> , <i>Cornus suecica</i>                                                                                                                                                                                                                                                                                                                                                                                    |
| <i>Corylus</i>     | <i>Corylus</i> , <i>Corylus avellana</i> , <i>Corylus avellana</i> type, <i>Corylus maxima</i> , <i>Corylus</i> type                                                                                                                                                                                                                                                                                                                                                                                                 |
| <i>Cotinus</i>     | <i>Cotinus</i> , <i>Cotinus coggygria</i> , <i>Cotinus</i> type                                                                                                                                                                                                                                                                                                                                                                                                                                                      |
| <i>Cotoneaster</i> | <i>Cotoneaster</i>                                                                                                                                                                                                                                                                                                                                                                                                                                                                                                   |
| Crassulaceae       | <i>Crassula</i> , Crassulaceae, <i>Sedum</i> , <i>Sedum rosea</i> , <i>Sedum</i> type, <i>Sempervivum</i> , <i>Umbilicus</i> , <i>Umbilicus rupestris</i> type                                                                                                                                                                                                                                                                                                                                                       |
| <i>Crataegus</i>   | <i>Crataegus</i> , <i>Crataegus monogyna</i> , <i>Crataegus</i> type                                                                                                                                                                                                                                                                                                                                                                                                                                                 |
| Cucurbitaceae      | <i>Cucumis</i> , Cucurbitaceae                                                                                                                                                                                                                                                                                                                                                                                                                                                                                       |
| Cupressaceae       | Cupressaceae, <i>Cupressus</i> , <i>Cupressus</i> type, <i>Juniperus</i> , <i>Juniperus communis</i> , <i>Juniperus communis</i> type, <i>Juniperus excelsa/Juniperus oxycedrus</i> , <i>Juniperus sabina</i> , <i>Juniperus</i> type, Taxodiaceae, <i>Taxodium</i>                                                                                                                                                                                                                                                  |
| <i>Cynomorium</i>  | <i>Cynomorium</i>                                                                                                                                                                                                                                                                                                                                                                                                                                                                                                    |
| Cyperaceae         | <i>Carex</i> , <i>Carex hirta</i> type, <i>Carex</i> type, Cyperaceae, <i>Cyperus</i> , <i>Cyperus longus</i> type, <i>Cyperus</i> type, <i>Eleocharis palustris</i> , <i>Eriophorum angustifolium/Eriophorum vaginatum</i> , <i>Eriophorum</i> type, <i>Rhynchospora</i> , <i>Rhynchospora alba</i> , <i>Schoenoplectus lacustris</i> ssp <i>lacustris</i> , <i>Schoenoplectus</i> type, <i>Schoenus</i> type, <i>Scirpus</i> , <i>Scirpus lacustris</i> type, <i>Scirpus</i> type, <i>Trichophorum caespitosum</i> |
| Cytinaceae         | <i>Cytinus hypocistis</i> type                                                                                                                                                                                                                                                                                                                                                                                                                                                                                       |
| <i>Daphne</i>      | <i>Daphne</i> , <i>Daphne gnidium</i> , <i>Daphne gnidium</i> type, <i>Daphne</i> type                                                                                                                                                                                                                                                                                                                                                                                                                               |
| <i>Datisca</i>     | <i>Datisca</i>                                                                                                                                                                                                                                                                                                                                                                                                                                                                                                       |
| <i>Delphinium</i>  | <i>Delphinium</i> type                                                                                                                                                                                                                                                                                                                                                                                                                                                                                               |
| Dennstaedtiaceae   | <i>Pteridium</i> , <i>Pteridium aquilinum</i> , <i>Pteridium aquilinum</i> type, <i>Pteridium</i> type                                                                                                                                                                                                                                                                                                                                                                                                               |
| <i>Diapensia</i>   | <i>Diapensia</i> , <i>Diapensia lapponica</i>                                                                                                                                                                                                                                                                                                                                                                                                                                                                        |
| <i>Dryas</i>       | <i>Dryas</i> , <i>Dryas octopetala</i>                                                                                                                                                                                                                                                                                                                                                                                                                                                                               |
| <i>Elaeagnus</i>   | <i>Elaeagnus</i> , <i>Elaeagnus angustifolia</i>                                                                                                                                                                                                                                                                                                                                                                                                                                                                     |
| <i>Empetrum</i>    | <i>Empetrum</i> , <i>Empetrum nigrum</i> , <i>Empetrum nigrum</i> type, <i>Empetrum</i> type                                                                                                                                                                                                                                                                                                                                                                                                                         |

|                  |                                                                                                                                                                                                                                                                                                                                                                                                                                                                                                                                                                                                                                                                                                                                                                                                                                                                                                                                                                                                                                                                                                                                                                             |
|------------------|-----------------------------------------------------------------------------------------------------------------------------------------------------------------------------------------------------------------------------------------------------------------------------------------------------------------------------------------------------------------------------------------------------------------------------------------------------------------------------------------------------------------------------------------------------------------------------------------------------------------------------------------------------------------------------------------------------------------------------------------------------------------------------------------------------------------------------------------------------------------------------------------------------------------------------------------------------------------------------------------------------------------------------------------------------------------------------------------------------------------------------------------------------------------------------|
| <i>Ephedra</i>   | <i>Ephedra</i> , <i>Ephedra alata</i> type, <i>Ephedra distachya</i> , <i>Ephedra distachya</i> type, <i>Ephedra fragilis</i> , <i>Ephedra fragilis</i> ssp <i>campylopoda</i> , <i>Ephedra fragilis</i> type, <i>Ephedra major</i> , <i>Ephedra</i> type                                                                                                                                                                                                                                                                                                                                                                                                                                                                                                                                                                                                                                                                                                                                                                                                                                                                                                                   |
| <i>Equisetum</i> | <i>Equisetum</i>                                                                                                                                                                                                                                                                                                                                                                                                                                                                                                                                                                                                                                                                                                                                                                                                                                                                                                                                                                                                                                                                                                                                                            |
| <i>Erica</i>     | <i>Erica</i> , <i>Erica arborea</i> , <i>Erica arborea</i> type, <i>Erica australis</i> , <i>Erica australis</i> type, <i>Erica cinerea</i> , <i>Erica cinerea</i> type, <i>Erica erigena</i> type, <i>Erica lusitanica</i> , <i>Erica lusitanica</i> type, <i>Erica scoparia</i> type, <i>Erica spiculifolia</i> , <i>Erica tetralix</i> , <i>Erica tetralix</i> type, <i>Erica</i> type, <i>Erica umbellata</i> type                                                                                                                                                                                                                                                                                                                                                                                                                                                                                                                                                                                                                                                                                                                                                      |
| Ericaceae        | <i>Empetrum/Ledum</i> , Ericaceae, Ericales, <i>Lecythis</i> , <i>Moneses</i> , <i>Orthilia</i> , <i>Phyllodoce</i> , <i>Pyrola</i>                                                                                                                                                                                                                                                                                                                                                                                                                                                                                                                                                                                                                                                                                                                                                                                                                                                                                                                                                                                                                                         |
| <i>Euonymus</i>  | <i>Euonymus</i> , <i>Euonymus europaeus</i>                                                                                                                                                                                                                                                                                                                                                                                                                                                                                                                                                                                                                                                                                                                                                                                                                                                                                                                                                                                                                                                                                                                                 |
| Euphorbiaceae    | <i>Acalypha</i> , <i>Crozophora</i> , <i>Euphorbia</i> , <i>Euphorbia</i> type, Euphorbiaceae                                                                                                                                                                                                                                                                                                                                                                                                                                                                                                                                                                                                                                                                                                                                                                                                                                                                                                                                                                                                                                                                               |
| Fabaceae         | Fabaceae                                                                                                                                                                                                                                                                                                                                                                                                                                                                                                                                                                                                                                                                                                                                                                                                                                                                                                                                                                                                                                                                                                                                                                    |
| Fabaceae (herbs) | <i>Anthyllis</i> , <i>Coronilla</i> , <i>Galega</i> type, <i>Hedysarum hedysaroides</i> , <i>Hedysarum/Ebenus</i> , <i>Hippocrepis comosa</i> , <i>Hippocrepis</i> type, <i>Lathyrus</i> , <i>Lathyrus</i> type, <i>Lathyrus/Vicia</i> , <i>Lathyrus/Vicia</i> , <i>Lathyrus/Vicia</i> type, <i>Lotus</i> , <i>Lotus corniculatus</i> , <i>Lotus corniculatus</i> type, <i>Lotus</i> type, <i>Lotus uliginosus</i> , <i>Medicago</i> , <i>Medicago littoralis</i> type, <i>Medicago sativa</i> , <i>Medicago</i> type, <i>Melilotus</i> , <i>Melilotus officinalis</i> , <i>Melilotus</i> type, <i>Onobrychis</i> , <i>Onobrychis</i> type, <i>Oxytropis</i> , <i>Phaseolus</i> type, <i>Psoralea</i> , <i>Trifolium</i> , <i>Trifolium alpinum</i> type, <i>Trifolium badium</i> type, <i>Trifolium montanum</i> , <i>Trifolium pratense</i> , <i>Trifolium pratense</i> type, <i>Trifolium repens</i> , <i>Trifolium repens</i> type, <i>Trifolium spadiceum</i> type, <i>Trifolium</i> type, <i>Vicia</i> , <i>Vicia cracca</i> , <i>Vicia cracca</i> type, <i>Vicia faba</i> type, <i>Vicia lathyroides</i> , <i>Vicia sylvatica</i> type, <i>Vicia</i> type, Viciaceae |
| <i>Fagus</i>     | <i>Fagus</i> , <i>Fagus orientalis</i> , <i>Fagus sylvatica</i>                                                                                                                                                                                                                                                                                                                                                                                                                                                                                                                                                                                                                                                                                                                                                                                                                                                                                                                                                                                                                                                                                                             |
| <i>Flueggea</i>  | <i>Securinega tinctoria</i> type                                                                                                                                                                                                                                                                                                                                                                                                                                                                                                                                                                                                                                                                                                                                                                                                                                                                                                                                                                                                                                                                                                                                            |
| <i>Frangula</i>  | <i>Frangula</i> , <i>Frangula alnus</i>                                                                                                                                                                                                                                                                                                                                                                                                                                                                                                                                                                                                                                                                                                                                                                                                                                                                                                                                                                                                                                                                                                                                     |
| <i>Fraxinus</i>  | <i>Fraxinus</i> , <i>Fraxinus angustifolia</i> , <i>Fraxinus angustifolia</i> subsp <i>oxycarpa</i> , <i>Fraxinus angustifolia</i> type, <i>Fraxinus excelsior</i> , <i>Fraxinus excelsior</i> type, <i>Fraxinus ornus</i> , <i>Fraxinus ornus</i> type, <i>Fraxinus oxycarpa</i> type                                                                                                                                                                                                                                                                                                                                                                                                                                                                                                                                                                                                                                                                                                                                                                                                                                                                                      |
| Genisteae        | <i>Cytisus</i> type, <i>Cytisus/Genista</i> , <i>Cytisus/Genista</i> type, <i>Cytisus/Ulex</i> , <i>Genista</i> , <i>Genista</i> type, <i>Genista/Ulex</i> , <i>Sarothamnus scoparius</i> , <i>Spartium</i> , <i>Ulex</i> , <i>Ulex</i> type                                                                                                                                                                                                                                                                                                                                                                                                                                                                                                                                                                                                                                                                                                                                                                                                                                                                                                                                |
| Gentianaceae     | <i>Centaurium</i> , <i>Centaurium maritimum</i> , <i>Centaurium</i> type, <i>Gentiana</i> , <i>Gentiana lutea/Gentiana pneumonanthe</i> , <i>Gentiana nivalis</i> type, <i>Gentiana pneumonanthe</i> , <i>Gentiana pneumonanthe</i> type, <i>Gentiana purpurea</i> , <i>Gentiana purpurea</i> type, Gentianaceae, <i>Gentianella</i> ,                                                                                                                                                                                                                                                                                                                                                                                                                                                                                                                                                                                                                                                                                                                                                                                                                                      |

*Gentianella campestris* type, *Gentianella germanica* type, *Swertia perennis*

|                     |                                                                                                                                                                                                                                                                                                                                                                                                                                                                                                                                                                                                                                                                                 |
|---------------------|---------------------------------------------------------------------------------------------------------------------------------------------------------------------------------------------------------------------------------------------------------------------------------------------------------------------------------------------------------------------------------------------------------------------------------------------------------------------------------------------------------------------------------------------------------------------------------------------------------------------------------------------------------------------------------|
| Geraniaceae         | <i>Erodium</i> , Geraniaceae, <i>Geranium</i> , <i>Geranium sylvaticum</i> type, <i>Geranium</i> type                                                                                                                                                                                                                                                                                                                                                                                                                                                                                                                                                                           |
| <i>Halimium</i>     | <i>Halimium</i> , <i>Halimium</i> type                                                                                                                                                                                                                                                                                                                                                                                                                                                                                                                                                                                                                                          |
| <i>Hedera</i>       | <i>Hedera</i> , <i>Hedera helix</i> , <i>Hedera</i> type                                                                                                                                                                                                                                                                                                                                                                                                                                                                                                                                                                                                                        |
| <i>Helianthemum</i> | <i>Helianthemum</i> , <i>Helianthemum croceum</i> type, <i>Helianthemum nummularium</i> type, <i>Helianthemum salicifolium</i> type, <i>Helianthemum</i> type                                                                                                                                                                                                                                                                                                                                                                                                                                                                                                                   |
| <i>Helleborus</i>   | <i>Helleborus</i> , <i>Helleborus foetidus</i> , <i>Helleborus</i> type, <i>Helleborus viridis</i> type                                                                                                                                                                                                                                                                                                                                                                                                                                                                                                                                                                         |
| <i>Hepatica</i>     | <i>Hepatica</i>                                                                                                                                                                                                                                                                                                                                                                                                                                                                                                                                                                                                                                                                 |
| <i>Hippophae</i>    | <i>Hippophae</i> , <i>Hippophae rhamnoides</i>                                                                                                                                                                                                                                                                                                                                                                                                                                                                                                                                                                                                                                  |
| <i>Huperzia</i>     | <i>Huperzia selago</i> , <i>Huperzia selago</i> type, <i>Lycopodium selago</i>                                                                                                                                                                                                                                                                                                                                                                                                                                                                                                                                                                                                  |
| Hymenophyllaceae    | <i>Hymenophyllum tunbrigense</i> , <i>Hymenophyllum wilsonii</i> , <i>Trichomanes speciosum</i>                                                                                                                                                                                                                                                                                                                                                                                                                                                                                                                                                                                 |
| Hypericaceae        | <i>Hypericum</i> , <i>Hypericum perforatum</i> type, <i>Hypericum pulchrum</i> type, <i>Hypericum</i> type                                                                                                                                                                                                                                                                                                                                                                                                                                                                                                                                                                      |
| <i>Ilex</i>         | <i>Ilex</i> , <i>Ilex aquifolium</i> , <i>Ilex</i> type                                                                                                                                                                                                                                                                                                                                                                                                                                                                                                                                                                                                                         |
| <i>Impatiens</i>    | <i>Impatiens</i>                                                                                                                                                                                                                                                                                                                                                                                                                                                                                                                                                                                                                                                                |
| Iridaceae           | <i>Crocus</i> , Iridaceae, <i>Iris</i> , <i>Iris humilis</i> , <i>Iris pseudacorus</i> , <i>Iris pseudacorus</i> type, <i>Iris</i> type                                                                                                                                                                                                                                                                                                                                                                                                                                                                                                                                         |
| <i>Jasminum</i>     | <i>Jasminum</i> , <i>Jasminum fruticans</i> , <i>Jasminum</i> type                                                                                                                                                                                                                                                                                                                                                                                                                                                                                                                                                                                                              |
| Juglandaceae        | Juglandaceae                                                                                                                                                                                                                                                                                                                                                                                                                                                                                                                                                                                                                                                                    |
| <i>Juglans</i>      | <i>Juglans</i> , <i>Juglans regia</i>                                                                                                                                                                                                                                                                                                                                                                                                                                                                                                                                                                                                                                           |
| Juncaceae           | Juncaceae, <i>Juncus</i> , <i>Luzula</i>                                                                                                                                                                                                                                                                                                                                                                                                                                                                                                                                                                                                                                        |
| <i>Kalmia</i>       | <i>Loiseleuria procumbens</i>                                                                                                                                                                                                                                                                                                                                                                                                                                                                                                                                                                                                                                                   |
| <i>Koenigia</i>     | <i>Koenigia islandica</i>                                                                                                                                                                                                                                                                                                                                                                                                                                                                                                                                                                                                                                                       |
| <i>Laburnum</i>     | <i>Laburnum anagyroides</i>                                                                                                                                                                                                                                                                                                                                                                                                                                                                                                                                                                                                                                                     |
| Lamiaceae           | <i>Ajuga</i> , <i>Ballota</i> , <i>Galeopsis</i> , <i>Galeopsis</i> type, <i>Galeopsis/Ballota</i> type, <i>Glechoma</i> type, Lamiaceae, <i>Lamium</i> , <i>Lamium</i> type, <i>Lycopus</i> , <i>Lycopus</i> type, <i>Lycopus/Mentha</i> , <i>Marrubium</i> , <i>Mentha</i> , <i>Mentha</i> type, <i>Mentha/Thymus</i> , <i>Mentha/Thymus</i> type, <i>Nepeta</i> , <i>Origanum vulgare</i> , <i>Prunella</i> , <i>Prunella</i> type, <i>Prunella vulgaris</i> type, <i>Scutellaria</i> type, <i>Sideritis</i> , <i>Stachys</i> , <i>Stachys sylvatica</i> type, <i>Stachys sylvestris</i> , <i>Stachys</i> type, <i>Thymus</i> , <i>Thymus serpyllum</i> , <i>Thymus</i> type |
| <i>Larix</i>        | <i>Larix</i> , <i>Larix decidua</i> , <i>Larix decidua</i> type, <i>Larix</i> type, <i>Larix/Pseudotsuga</i>                                                                                                                                                                                                                                                                                                                                                                                                                                                                                                                                                                    |
| <i>Laurus</i>       | <i>Laurus</i>                                                                                                                                                                                                                                                                                                                                                                                                                                                                                                                                                                                                                                                                   |
| <i>Lavandula</i>    | <i>Lavandula stoechas</i> type                                                                                                                                                                                                                                                                                                                                                                                                                                                                                                                                                                                                                                                  |

|                     |                                                                                                                                                                                                                                                                                                                                                                                                                                                                                         |
|---------------------|-----------------------------------------------------------------------------------------------------------------------------------------------------------------------------------------------------------------------------------------------------------------------------------------------------------------------------------------------------------------------------------------------------------------------------------------------------------------------------------------|
| <i>Ledum</i>        | <i>Ledum</i> , <i>Ledum palustre</i> , <i>Ledum</i> type                                                                                                                                                                                                                                                                                                                                                                                                                                |
| <i>Ligustrum</i>    | <i>Ligustrum</i> , <i>Ligustrum vulgare</i> , <i>Ligustrum vulgare</i> type, <i>Olea/Ligustrum</i>                                                                                                                                                                                                                                                                                                                                                                                      |
| Liliaceae           | <i>Allium</i> , <i>Allium</i> type, <i>Anthericum</i> , <i>Anthericum</i> type, <i>Asphodeline</i> , <i>Asphodelus</i> , <i>Asphodelus albus</i> , <i>Asphodelus albus</i> type, <i>Asphodelus fistulosus</i> type, <i>Asphodelus</i> type, <i>Fritillaria lusitanica</i> , <i>Gagea</i> , Liliaceae, <i>Lilium</i> , <i>Lilium martagon</i> type, <i>Lloydia serotina</i> , <i>Tulipa</i>                                                                                              |
| Linaceae            | Linaceae, <i>Radiola linoides</i>                                                                                                                                                                                                                                                                                                                                                                                                                                                       |
| <i>Linnaea</i>      | <i>Linnaea</i> , <i>Linnaea borealis</i>                                                                                                                                                                                                                                                                                                                                                                                                                                                |
| <i>Linum</i>        | <i>Linum</i> , <i>Linum catharticum</i> , <i>Linum catharticum</i> type                                                                                                                                                                                                                                                                                                                                                                                                                 |
| <i>Lonicera</i>     | <i>Lonicera</i> , <i>Lonicera caerulea</i> , <i>Lonicera hispida</i> , <i>Lonicera implexa</i> , <i>Lonicera periclymenum</i> , <i>Lonicera</i> type, <i>Lonicera xylosteum</i> type                                                                                                                                                                                                                                                                                                    |
| Loranthaceae        | Loranthaceae, <i>Loranthus</i>                                                                                                                                                                                                                                                                                                                                                                                                                                                          |
| <i>Lycopodiella</i> | <i>Lepidotis inundata</i> , <i>Lycopodium inundatum</i>                                                                                                                                                                                                                                                                                                                                                                                                                                 |
| <i>Lycopodium</i>   | <i>Diphasiastrum</i> , <i>Diphasiastrum alpinum</i> , <i>Diphasium</i> , <i>Diphasium alpinum</i> , <i>Diphasium alpinum</i> type, <i>Diphasium complanatum</i> , <i>Diphasium tristachyum</i> , <i>Diphasium</i> type, <i>Lycopodium</i> , <i>Lycopodium alpinum</i> , <i>Lycopodium annotinum</i> , <i>Lycopodium annotinum</i> type, <i>Lycopodium clavatum</i> , <i>Lycopodium clavatum</i> type, <i>Lycopodium complanatum</i> , <i>Lycopodium dubium</i> , <i>Lycopodium</i> type |
| <i>Lysimachia</i>   | <i>Lysimachia</i> , <i>Lysimachia maritima</i> , <i>Lysimachia nemorum</i> , <i>Lysimachia thyrsiflora</i> , <i>Lysimachia</i> type, <i>Lysimachia vulgaris</i> , <i>Lysimachia vulgaris</i> type                                                                                                                                                                                                                                                                                       |
| Lythraceae          | Lythraceae, <i>Lythrum</i> , <i>Lythrum salicaria</i> , <i>Lythrum salicaria</i> type, <i>Lythrum salicaria/Lythrum hyssopifolia</i> , <i>Peplis</i>                                                                                                                                                                                                                                                                                                                                    |
| Magnoliaceae        | Magnoliaceae                                                                                                                                                                                                                                                                                                                                                                                                                                                                            |
| <i>Malus</i>        | <i>Malus</i> , <i>Malus</i> type                                                                                                                                                                                                                                                                                                                                                                                                                                                        |
| Malvaceae           | <i>Hibiscus</i> , <i>Malva</i> , <i>Malva sylvestris</i> type, <i>Malva</i> type, Malvaceae, <i>Sterculia</i>                                                                                                                                                                                                                                                                                                                                                                           |
| Melanthiaceae       | <i>Veratrum</i> , <i>Veratrum</i> type                                                                                                                                                                                                                                                                                                                                                                                                                                                  |
| <i>Mercurialis</i>  | <i>Mercurialis</i> , <i>Mercurialis annua</i> , <i>Mercurialis annua</i> type, <i>Mercurialis perennis</i> , <i>Mercurialis perennis</i> type                                                                                                                                                                                                                                                                                                                                           |
| <i>Moltkia</i>      | <i>Moltkia</i>                                                                                                                                                                                                                                                                                                                                                                                                                                                                          |
| Montiaceae          | <i>Montia</i> , <i>Montia fontana</i>                                                                                                                                                                                                                                                                                                                                                                                                                                                   |
| Moraceae            | <i>Ficus</i> , Moraceae, <i>Morus</i> , <i>Morus alba</i> , <i>Morus alba</i> type, <i>Morus nigra</i>                                                                                                                                                                                                                                                                                                                                                                                  |
| <i>Myrica</i>       | <i>Corylus/Myrica</i> , <i>Myrica</i> , <i>Myrica gale</i> , <i>Myrica gale</i> type, <i>Myrica</i> type                                                                                                                                                                                                                                                                                                                                                                                |
| <i>Myricaria</i>    | <i>Myricaria</i> , <i>Myricaria</i> type                                                                                                                                                                                                                                                                                                                                                                                                                                                |
| Myrtaceae           | Myrtaceae, <i>Myrtus</i> , <i>Myrtus communis</i>                                                                                                                                                                                                                                                                                                                                                                                                                                       |
| Nartheciaceae       | <i>Narthecium</i> , <i>Narthecium ossifragum</i> , <i>Narthecium</i> type                                                                                                                                                                                                                                                                                                                                                                                                               |
| <i>Nerium</i>       | <i>Nerium</i> , <i>Nerium oleander</i>                                                                                                                                                                                                                                                                                                                                                                                                                                                  |



|                           |                                                                                                                                                                                                                                                                                                                                                                                                                                                                                                                                                                                                                                                                                                                                                                      |
|---------------------------|----------------------------------------------------------------------------------------------------------------------------------------------------------------------------------------------------------------------------------------------------------------------------------------------------------------------------------------------------------------------------------------------------------------------------------------------------------------------------------------------------------------------------------------------------------------------------------------------------------------------------------------------------------------------------------------------------------------------------------------------------------------------|
| <i>Nigella</i>            | <i>Nigella</i>                                                                                                                                                                                                                                                                                                                                                                                                                                                                                                                                                                                                                                                                                                                                                       |
| Nitrariaceae              | <i>Nitraria</i> , <i>Peganum</i> , <i>Peganum harmala</i>                                                                                                                                                                                                                                                                                                                                                                                                                                                                                                                                                                                                                                                                                                            |
| <i>Olea</i>               | <i>Olea</i> , <i>Olea europaea</i> , <i>Olea</i> type                                                                                                                                                                                                                                                                                                                                                                                                                                                                                                                                                                                                                                                                                                                |
| Oleaceae                  | Oleaceae                                                                                                                                                                                                                                                                                                                                                                                                                                                                                                                                                                                                                                                                                                                                                             |
| Onagraceae                | <i>Chamaenerion</i> , <i>Chamaenerion angustifolium</i> , <i>Circaea</i> , <i>Epilobium</i> , <i>Epilobium</i> type, Onagraceae                                                                                                                                                                                                                                                                                                                                                                                                                                                                                                                                                                                                                                      |
| <i>Ononis</i>             | <i>Ononis</i> , <i>Ononis</i> type                                                                                                                                                                                                                                                                                                                                                                                                                                                                                                                                                                                                                                                                                                                                   |
| Ophioglossaceae           | <i>Botrychium</i> , <i>Botrychium lunaria</i> , <i>Botrychium lunaria</i> type, <i>Botrychium</i> type, Ophioglossaceae, <i>Ophioglossum</i> , <i>Ophioglossum vulgatum</i>                                                                                                                                                                                                                                                                                                                                                                                                                                                                                                                                                                                          |
| Orchidaceae               | <i>Neottia</i> type, Orchidaceae                                                                                                                                                                                                                                                                                                                                                                                                                                                                                                                                                                                                                                                                                                                                     |
| Osmundaceae               | <i>Osmunda</i> , <i>Osmunda regalis</i>                                                                                                                                                                                                                                                                                                                                                                                                                                                                                                                                                                                                                                                                                                                              |
| Oxalidaceae               | Oxalidaceae, <i>Oxalis</i> , <i>Oxalis acetosella</i> , <i>Oxalis stricta</i>                                                                                                                                                                                                                                                                                                                                                                                                                                                                                                                                                                                                                                                                                        |
| <i>Oxyria/Rumex</i>       | <i>Oxyria</i> , <i>Oxyria digyna</i> , <i>Oxyria</i> type, <i>Oxyria/Rumex</i> , <i>Rumex</i> , <i>Rumex acetosa</i> , <i>Rumex acetosa</i> type, <i>Rumex acetosa/Oxyria</i> type, <i>Rumex acetosa/Rumex acetosella</i> , <i>Rumex acetosa/Rumex acetosella</i> type, <i>Rumex acetosa/Rumex scutatus</i> type, <i>Rumex acetosella</i> , <i>Rumex acetosella</i> type, <i>Rumex alpestris</i> , <i>Rumex alpinus</i> , <i>Rumex alpinus</i> type, <i>Rumex aquaticus</i> , <i>Rumex aquaticus</i> type, <i>Rumex conglomeratus</i> type, <i>Rumex crispus</i> , <i>Rumex crispus</i> type, <i>Rumex hydrolapathum</i> , <i>Rumex longifolius</i> , <i>Rumex longifolius</i> type, <i>Rumex obtusifolius</i> type, <i>Rumex sanguineus</i> type, <i>Rumex</i> type |
| <i>Paeonia</i>            | <i>Paeonia</i>                                                                                                                                                                                                                                                                                                                                                                                                                                                                                                                                                                                                                                                                                                                                                       |
| <i>Paliurus</i>           | <i>Paliurus</i> , <i>Paliurus spina-christi</i>                                                                                                                                                                                                                                                                                                                                                                                                                                                                                                                                                                                                                                                                                                                      |
| Papaveraceae              | <i>Chelidonium majus</i> , <i>Corydalis</i> , <i>Corydalis solida</i> type, <i>Corydalis</i> type, <i>Fumana</i> , <i>Fumaria</i> , <i>Fumaria officinalis</i> type, <i>Glaucium</i> , <i>Glaucium</i> type, <i>Hypecoum</i> , <i>Papaver</i> , <i>Papaver argemone</i> , <i>Papaver rhoeas</i> type, <i>Papaver</i> type, Papaveraceae, <i>Roemeria</i> , <i>Roemeria hybrida</i> type                                                                                                                                                                                                                                                                                                                                                                              |
| <i>Parrotia</i>           | <i>Parrotia persica</i> , <i>Parrotia persica</i> type                                                                                                                                                                                                                                                                                                                                                                                                                                                                                                                                                                                                                                                                                                               |
| <i>Periploca</i>          | <i>Periploca</i>                                                                                                                                                                                                                                                                                                                                                                                                                                                                                                                                                                                                                                                                                                                                                     |
| <i>Phillyrea</i>          | <i>Fontanesia/Phillyrea</i> , <i>Olea/Phillyrea</i> , <i>Phillyrea</i> , <i>Phillyrea angustifolia</i> , <i>Phillyrea angustifolia</i> type, <i>Phillyrea media</i> , <i>Phillyrea</i> type                                                                                                                                                                                                                                                                                                                                                                                                                                                                                                                                                                          |
| <i>Phlomis</i>            | <i>Phlomis</i>                                                                                                                                                                                                                                                                                                                                                                                                                                                                                                                                                                                                                                                                                                                                                       |
| Phyllanthaceae            | <i>Andrachne</i> , <i>Andrachne telephioides</i>                                                                                                                                                                                                                                                                                                                                                                                                                                                                                                                                                                                                                                                                                                                     |
| <i>Picea</i>              | <i>Picea</i> , <i>Picea abies</i> , <i>Picea abies</i> subsp <i>abies</i>                                                                                                                                                                                                                                                                                                                                                                                                                                                                                                                                                                                                                                                                                            |
| <i>Picea orientalis</i>   | <i>Picea orientalis</i>                                                                                                                                                                                                                                                                                                                                                                                                                                                                                                                                                                                                                                                                                                                                              |
| <i>Pinus (diploxylon)</i> | <i>Pinus</i> , <i>Pinus (Diploxylon)</i> , <i>Pinus halepensis</i> , <i>Pinus nigra</i> type, <i>Pinus non-cembra</i> , <i>Pinus pinaster</i> , <i>Pinus pinaster</i> type, <i>Pinus pinaster/Pinus halepensis</i> , <i>Pinus pinea</i> type, <i>Pinus pinea/Pinus halepensis</i> type, <i>Pinus sylvestris</i> , <i>Pinus sylvestris</i> type, <i>Pinus sylvestris/Pinus nigra</i> type, <i>Pinus</i> type                                                                                                                                                                                                                                                                                                                                                          |
| <i>Pinus (haploxylon)</i> | <i>Pinus (Haploxylon)</i> , <i>Pinus cembra</i> , <i>Pinus cembra</i> type, <i>Pinus peuce</i> , <i>Pinus pumila</i> , <i>Pinus sibirica</i>                                                                                                                                                                                                                                                                                                                                                                                                                                                                                                                                                                                                                         |

|                  |                                                                                                                                                                                                                                                                                                                                                                                                                                                                                                                                                                                                                                                                                                                                                                                                                                                                                                                                                                                        |
|------------------|----------------------------------------------------------------------------------------------------------------------------------------------------------------------------------------------------------------------------------------------------------------------------------------------------------------------------------------------------------------------------------------------------------------------------------------------------------------------------------------------------------------------------------------------------------------------------------------------------------------------------------------------------------------------------------------------------------------------------------------------------------------------------------------------------------------------------------------------------------------------------------------------------------------------------------------------------------------------------------------|
| <i>Pistacia</i>  | <i>Pistacia</i> , <i>Pistacia lentiscus</i> , <i>Pistacia lentiscus</i> type, <i>Pistacia terebinthus</i> , <i>Pistacia terebinthus</i> type, <i>Pistacia</i> type                                                                                                                                                                                                                                                                                                                                                                                                                                                                                                                                                                                                                                                                                                                                                                                                                     |
| Plantaginaceae   | <i>Globularia</i> , <i>Gratiola officinalis</i> , <i>Hippuris vulgaris</i> , Plantaginaceae, <i>Plantago</i> , <i>Plantago afra</i> type, <i>Plantago albicans</i> , <i>Plantago alpina</i> , <i>Plantago alpina</i> type, <i>Plantago coronopus</i> , <i>Plantago coronopus</i> type, <i>Plantago cylindrica</i> type, <i>Plantago lagopus</i> type, <i>Plantago lanceolata</i> , <i>Plantago lanceolata</i> type, <i>Plantago lanceolata</i> / <i>Plantago major</i> type, <i>Plantago lusitanica</i> , <i>Plantago major</i> , <i>Plantago major</i> type, <i>Plantago maritima</i> , <i>Plantago maritima</i> type, <i>Plantago maritima</i> / <i>Plantago alpina</i> type, <i>Plantago media</i> , <i>Plantago media</i> type, <i>Plantago media</i> / <i>Plantago major</i> , <i>Plantago media</i> / <i>Plantago major</i> type, <i>Plantago montana</i> type, <i>Plantago ovata</i> type, <i>Plantago psyllium</i> type, <i>Plantago tenuiflora</i> type, <i>Plantago</i> type |
| <i>Platanus</i>  | <i>Platanus</i> , <i>Platanus orientalis</i> , <i>Platanus</i> type                                                                                                                                                                                                                                                                                                                                                                                                                                                                                                                                                                                                                                                                                                                                                                                                                                                                                                                    |
| Plumbaginaceae   | <i>Acantholimon</i> , <i>Armeria</i> , <i>Armeria maritima</i> , <i>Armeria maritima</i> subsp <i>elongata</i> , <i>Armeria</i> type, <i>Armeria/Limonium</i> , <i>Armeria/Limonium</i> type, <i>Goniolimon</i> , <i>Limonium</i> , <i>Limonium</i> type, <i>Limonium vulgare</i> , Plumbaginaceae                                                                                                                                                                                                                                                                                                                                                                                                                                                                                                                                                                                                                                                                                     |
| Poaceae          | <i>Anthoxanthum</i> , <i>Deschampsia</i> , <i>Elymus</i> , <i>Glyceria</i> , <i>Lygeum</i> , <i>Lygeum spartum</i> , <i>Nardus</i> , <i>Poa/Festuca</i> type, Poaceae, <i>Setaria</i>                                                                                                                                                                                                                                                                                                                                                                                                                                                                                                                                                                                                                                                                                                                                                                                                  |
| Polemoniaceae    | Polemoniaceae, <i>Polemonium</i> , <i>Polemonium caeruleum</i>                                                                                                                                                                                                                                                                                                                                                                                                                                                                                                                                                                                                                                                                                                                                                                                                                                                                                                                         |
| Polygalaceae     | <i>Polygala</i> , <i>Polygala comosa</i> type, <i>Polygala</i> type, <i>Polygala vulgaris</i> , <i>Polygala vulgaris</i> type, Polygalaceae, <i>Polygaloides chamaebuxus</i>                                                                                                                                                                                                                                                                                                                                                                                                                                                                                                                                                                                                                                                                                                                                                                                                           |
| Polygonaceae     | <i>Atraphaxis</i> , <i>Bilderdykia convolvulus</i> , <i>Bilderdykia convolvulus</i> type, <i>Bistorta officinalis</i> type, <i>Bistorta vivipara</i> , <i>Calligonum</i> , <i>Fallopia</i> , <i>Fallopia convolvulus</i> , <i>Fallopia convolvulus</i> type, <i>Persicaria</i> , <i>Persicaria amphibia</i> , Polygonaceae, <i>Pteropyrum</i> , <i>Rheum</i> , <i>Rheum</i> type                                                                                                                                                                                                                                                                                                                                                                                                                                                                                                                                                                                                       |
| <i>Polygonum</i> | <i>Polygonum</i> , <i>Polygonum alpinum</i> , <i>Polygonum amphibium</i> , <i>Polygonum amphibium</i> type, <i>Polygonum aviculare</i> , <i>Polygonum aviculare</i> type, <i>Polygonum aviculare</i> / <i>Polygonum bistorta</i> type, <i>Polygonum bistorta</i> , <i>Polygonum bistorta</i> type, <i>Polygonum bistorta</i> / <i>Polygonum viviparum</i> , <i>Polygonum cognatum</i> , <i>Polygonum cognatum</i> type, <i>Polygonum convolvulus</i> , <i>Polygonum convolvulus</i> type, <i>Polygonum oxyspermum</i> type, <i>Polygonum persicaria</i> , <i>Polygonum persicaria</i> type, <i>Polygonum</i> sect. <i>persicaria</i> , <i>Polygonum</i> type, <i>Polygonum viviparum</i>                                                                                                                                                                                                                                                                                               |

|                            |                                                                                                                                                                                                                                                                                                                                                                                                                                                                                                                                                                                                                                                                                                                                                                                                                                                                                                                                                                                                                                                                                                                                                                                                                                                                                                            |
|----------------------------|------------------------------------------------------------------------------------------------------------------------------------------------------------------------------------------------------------------------------------------------------------------------------------------------------------------------------------------------------------------------------------------------------------------------------------------------------------------------------------------------------------------------------------------------------------------------------------------------------------------------------------------------------------------------------------------------------------------------------------------------------------------------------------------------------------------------------------------------------------------------------------------------------------------------------------------------------------------------------------------------------------------------------------------------------------------------------------------------------------------------------------------------------------------------------------------------------------------------------------------------------------------------------------------------------------|
| <i>Polypodiales</i>        | <i>Asplenium</i> , <i>Asplenium ceterach</i> subsp <i>ceterach</i> , <i>Asplenium</i> type, <i>Asplenium viride</i> , <i>Athyrium</i> , <i>Athyrium alpestre</i> type, <i>Athyrium distentifolium</i> , <i>Athyrium distentifolium</i> type, <i>Athyrium filix-femina</i> , <i>Blechnum</i> , <i>Blechnum spicant</i> , <i>Cystopteris</i> , <i>Cystopteris fragilis</i> , <i>Cystopteris</i> type, <i>Dryopteridaceae/Polypodiaceae</i> , <i>Dryopteris</i> , <i>Dryopteris carthusiana</i> , <i>Dryopteris carthusiana</i> type, <i>Dryopteris cristata</i> , <i>Dryopteris cristata</i> type, <i>Dryopteris dilatata</i> , <i>Dryopteris dilatata</i> type, <i>Dryopteris expansa</i> , <i>Dryopteris filix-mas</i> , <i>Dryopteris filix-mas</i> type, <i>Dryopteris</i> type, <i>Dryopteris/Thelypteris</i> , <i>Grammitis</i> , <i>Gymnocarpium</i> , <i>Gymnocarpium dryopteris</i> , <i>Matteuccia struthiopteris</i> , <i>Pilularia</i> , <i>Polypodiaceae</i> , <i>Polypodiales</i> , <i>Polypodium</i> , <i>Polypodium serratum</i> , <i>Polypodium vulgare</i> , <i>Polypodium vulgare</i> type, <i>Polystichum</i> , <i>Polystichum</i> type, <i>Thelypteris</i> , <i>Thelypteris palustris</i> , <i>Thelypteris palustris</i> type, <i>Thelypteris phegopteris</i> , <i>Thelypteris</i> type |
| <i>Populus</i>             | <i>Populus</i> , <i>Populus tremula</i> , <i>Populus tremula</i> type                                                                                                                                                                                                                                                                                                                                                                                                                                                                                                                                                                                                                                                                                                                                                                                                                                                                                                                                                                                                                                                                                                                                                                                                                                      |
| <i>Portulacaceae</i>       | <i>Portulacaceae</i>                                                                                                                                                                                                                                                                                                                                                                                                                                                                                                                                                                                                                                                                                                                                                                                                                                                                                                                                                                                                                                                                                                                                                                                                                                                                                       |
| <i>Potentilla</i>          | <i>Potentilla</i> , <i>Potentilla aurea</i> , <i>Potentilla recta</i> , <i>Potentilla</i> type                                                                                                                                                                                                                                                                                                                                                                                                                                                                                                                                                                                                                                                                                                                                                                                                                                                                                                                                                                                                                                                                                                                                                                                                             |
| <i>Primulaceae</i>         | <i>Anagallis</i> , <i>Anagallis arvensis</i> , <i>Anagallis arvensis</i> type, <i>Anagallis tenella</i> , <i>Anagallis</i> type, <i>Androsace</i> , <i>Androsaceae</i> , <i>Cyclamen</i> , <i>Cyclamen hederifolium</i> , <i>Primula</i> , <i>Primula clusiana</i> type, <i>Primula farinosa</i> , <i>Primula farinosa</i> type, <i>Primula hirsuta</i> type, <i>Primula</i> type, <i>Primula veris</i> type, <i>Primula vulgaris</i> , <i>Primula vulgaris</i> type, <i>Primulaceae</i> , <i>Soldanella</i> , <i>Trientalis</i> , <i>Trientalis europaea</i>                                                                                                                                                                                                                                                                                                                                                                                                                                                                                                                                                                                                                                                                                                                                              |
| <i>Prosopis</i>            | <i>Prosopis</i>                                                                                                                                                                                                                                                                                                                                                                                                                                                                                                                                                                                                                                                                                                                                                                                                                                                                                                                                                                                                                                                                                                                                                                                                                                                                                            |
| <i>Prunus</i>              | <i>Prunus</i> , <i>Prunus avium</i> , <i>Prunus padus</i> , <i>Prunus spinosa</i> type, <i>Prunus</i> type                                                                                                                                                                                                                                                                                                                                                                                                                                                                                                                                                                                                                                                                                                                                                                                                                                                                                                                                                                                                                                                                                                                                                                                                 |
| <i>Pteridaceae</i>         | <i>Adiantum</i> , <i>Cheilanthes</i> , <i>Cheilanthes</i> type, <i>Cryptogramma</i> , <i>Cryptogramma crispa</i> , <i>Cryptogramma crispa</i> type, <i>Cryptomeria japonica</i> , <i>Pteris</i>                                                                                                                                                                                                                                                                                                                                                                                                                                                                                                                                                                                                                                                                                                                                                                                                                                                                                                                                                                                                                                                                                                            |
| <i>Pterocarya</i>          | <i>Pterocarya</i> , <i>Pterocarya fraxinifolia</i> , <i>Pterocarya pterocarpa</i>                                                                                                                                                                                                                                                                                                                                                                                                                                                                                                                                                                                                                                                                                                                                                                                                                                                                                                                                                                                                                                                                                                                                                                                                                          |
| <i>Pulsatilla</i>          | <i>Pulsatilla</i>                                                                                                                                                                                                                                                                                                                                                                                                                                                                                                                                                                                                                                                                                                                                                                                                                                                                                                                                                                                                                                                                                                                                                                                                                                                                                          |
| <i>Punica</i>              | <i>Punica</i>                                                                                                                                                                                                                                                                                                                                                                                                                                                                                                                                                                                                                                                                                                                                                                                                                                                                                                                                                                                                                                                                                                                                                                                                                                                                                              |
| <i>Pyrus</i>               | <i>Pyrus</i> , <i>Pyrus</i> type                                                                                                                                                                                                                                                                                                                                                                                                                                                                                                                                                                                                                                                                                                                                                                                                                                                                                                                                                                                                                                                                                                                                                                                                                                                                           |
| <i>Quercus (deciduous)</i> | <i>Quercus</i> , <i>Quercus cerris</i> , <i>Quercus cerris</i> type, <i>Quercus deciduous</i> , <i>Quercus infectoria</i> type, <i>Quercus petraea</i> , <i>Quercus robur</i> , <i>Quercus robur</i> type, <i>Quercus robur/Quercus petraea</i>                                                                                                                                                                                                                                                                                                                                                                                                                                                                                                                                                                                                                                                                                                                                                                                                                                                                                                                                                                                                                                                            |
| <i>Quercus (evergreen)</i> | <i>Quercus coccifera</i> , <i>Quercus coccifera</i> type, <i>Quercus coccifera/Quercus ilex</i> , <i>Quercus evergreen</i> , <i>Quercus ilex</i> , <i>Quercus ilex</i> type, <i>Quercus rotundifolia</i> type, <i>Quercus suber</i> , <i>Quercus suber</i> type                                                                                                                                                                                                                                                                                                                                                                                                                                                                                                                                                                                                                                                                                                                                                                                                                                                                                                                                                                                                                                            |

|                               |                                                                                                                                                                                                                                                                                                                                                                                                                                                                                                                                                                               |
|-------------------------------|-------------------------------------------------------------------------------------------------------------------------------------------------------------------------------------------------------------------------------------------------------------------------------------------------------------------------------------------------------------------------------------------------------------------------------------------------------------------------------------------------------------------------------------------------------------------------------|
| <i>Quercus (intermediate)</i> | <i>Quercus canariensis</i> type, <i>Quercus cerris/Quercus suber</i> , <i>Quercus cerris/Quercus suber</i> type, <i>Quercus faginea</i> , <i>Quercus faginea/Quercus pubescens</i> , <i>Quercus faginea/Quercus pyrenaica</i> , <i>Quercus pubescens</i> type, <i>Quercus pyrenaica</i> type, <i>Quercus robur/Quercus pubescens</i> type                                                                                                                                                                                                                                     |
| Ranunculaceae                 | Ranunculaceae                                                                                                                                                                                                                                                                                                                                                                                                                                                                                                                                                                 |
| <i>Ranunculus</i>             | <i>Ranunculus</i> , <i>Ranunculus acer</i> type, <i>Ranunculus aconitifolius</i> , <i>Ranunculus aconitifolius</i> type, <i>Ranunculus acris</i> , <i>Ranunculus acris</i> type, <i>Ranunculus arvensis</i> , <i>Ranunculus arvensis</i> type, <i>Ranunculus asiaticus</i> type, <i>Ranunculus ficaria</i> type, <i>Ranunculus flammula</i> type, <i>Ranunculus glacialis</i> type, <i>Ranunculus montanus</i> type, <i>Ranunculus nivalis</i> type, <i>Ranunculus parviflorus</i> , <i>Ranunculus repens</i> type, <i>Ranunculus sceleratus</i> type, <i>Ranunculus</i> type |
| Resedaceae                    | <i>Reseda</i> , <i>Reseda lutea</i> , <i>Reseda lutea</i> type, Resedaceae                                                                                                                                                                                                                                                                                                                                                                                                                                                                                                    |
| Rhamnaceae                    | Rhamnaceae                                                                                                                                                                                                                                                                                                                                                                                                                                                                                                                                                                    |
| <i>Rhamnus</i>                | <i>Rhamnus</i> , <i>Rhamnus catharticus</i> , <i>Rhamnus</i> type                                                                                                                                                                                                                                                                                                                                                                                                                                                                                                             |
| <i>Rhododendron</i>           | <i>Rhododendron</i> , <i>Rhododendron ferrugineum</i> , <i>Rhododendron</i> type                                                                                                                                                                                                                                                                                                                                                                                                                                                                                              |
| <i>Rhus</i>                   | <i>Rhus</i> , <i>Rhus coriaria</i>                                                                                                                                                                                                                                                                                                                                                                                                                                                                                                                                            |
| <i>Ribes</i>                  | <i>Ribes</i> , <i>Ribes</i> type                                                                                                                                                                                                                                                                                                                                                                                                                                                                                                                                              |
| <i>Robinia</i>                | <i>Robinia pseudacacia</i>                                                                                                                                                                                                                                                                                                                                                                                                                                                                                                                                                    |
| Rosaceae                      | <i>Agrimonia</i> , <i>Agrimonia</i> type, <i>Alchemilla</i> , <i>Alchemilla pentaphylla</i> type, <i>Alchemilla</i> type, <i>Aruncus</i> type, <i>Filipendula</i> , <i>Filipendula</i> type, <i>Filipendula ulmaria</i> , <i>Filipendula vulgaris</i> , <i>Fragaria</i> , <i>Geum</i> , <i>Geum rivale</i> type, <i>Geum</i> type, <i>Pirus</i> type, <i>Prunus/Rubus</i> type, <i>Pyrus/Malus</i> , <i>Rosa</i> , <i>Rosa canina</i> type, <i>Rosa</i> type, <i>Rosa/Prunus</i> , Rosaceae, Rosaceae subfam. Maloideae, Rosaceae subgen. <i>Amygdalus</i> , <i>Spiraea</i>   |
| <i>Rosmarinus</i>             | <i>Rosmarinus</i> , <i>Rosmarinus</i> type                                                                                                                                                                                                                                                                                                                                                                                                                                                                                                                                    |
| Rubiaceae                     | <i>Asperula</i> type, <i>Galium</i> , <i>Galium</i> type, Rubiaceae, <i>Theligonum</i> , <i>Theligonum cynocrambe</i>                                                                                                                                                                                                                                                                                                                                                                                                                                                         |
| <i>Rubus</i>                  | <i>Rubus</i> , <i>Rubus arcticus</i> , <i>Rubus arcticus</i> type, <i>Rubus chamaemorus</i> , <i>Rubus fruticosus</i> type, <i>Rubus idaeus</i> type, <i>Rubus saxatilis</i> , <i>Rubus</i> type                                                                                                                                                                                                                                                                                                                                                                              |
| <i>Ruscus</i>                 | <i>Ruscus</i>                                                                                                                                                                                                                                                                                                                                                                                                                                                                                                                                                                 |
| Rutaceae                      | <i>Haplophyllum</i> , <i>Ruta</i> , Rutaceae                                                                                                                                                                                                                                                                                                                                                                                                                                                                                                                                  |
| <i>Salix</i>                  | <i>Salix</i> , <i>Salix glauca</i> type, <i>Salix helvetica</i> type, <i>Salix herbacea</i> , <i>Salix herbacea</i> type, <i>Salix herbacea/Salix reticulata</i> , <i>Salix pentandra</i> type, <i>Salix polaris</i>                                                                                                                                                                                                                                                                                                                                                          |
| <i>Salvia</i>                 | <i>Salvia</i> , <i>Salvia</i> type, <i>Salvia verticillata</i> type                                                                                                                                                                                                                                                                                                                                                                                                                                                                                                           |
| <i>Sambucus</i>               | <i>Sambucus</i> , <i>Sambucus nigra</i> , <i>Sambucus nigra</i> type, <i>Sambucus nigra/Sambucus racemosa</i> , <i>Sambucus racemosa</i> , <i>Sambucus</i> type                                                                                                                                                                                                                                                                                                                                                                                                               |

|                          |                                                                                                                                                                                                                                                                                                                                                                                                                                                                                                                                                                                                                                                                                                                  |
|--------------------------|------------------------------------------------------------------------------------------------------------------------------------------------------------------------------------------------------------------------------------------------------------------------------------------------------------------------------------------------------------------------------------------------------------------------------------------------------------------------------------------------------------------------------------------------------------------------------------------------------------------------------------------------------------------------------------------------------------------|
| <i>Sanguisorba</i> group | <i>Poterium</i> , <i>Poterium</i> type, <i>Sanguisorba</i> , <i>Sanguisorba minor</i> , <i>Sanguisorba minor</i> ssp <i>minor</i> , <i>Sanguisorba minor</i> type, <i>Sanguisorba minor</i> / <i>Poterium</i> , <i>Sanguisorba officinalis</i> , <i>Sanguisorba officinalis</i> type, <i>Sanguisorba</i> type, <i>Sarcopoterium spinosum</i> / <i>Sanguisorba minor</i> , <i>Sarcopoterium</i> type                                                                                                                                                                                                                                                                                                              |
| Santalaceae              | <i>Arceuthobium oxycedri</i> , <i>Osyris alba</i> type, <i>Thesium</i>                                                                                                                                                                                                                                                                                                                                                                                                                                                                                                                                                                                                                                           |
| Saxifragaceae            | <i>Bergenia crassifolia</i> , <i>Chrysosplenium</i> , <i>Chrysosplenium</i> type, <i>Micranthes nivalis</i> type, <i>Saxifraga</i> , <i>Saxifraga cernua</i> type, <i>Saxifraga cespitosa</i> type, <i>Saxifraga foliolosa</i> type, <i>Saxifraga granulata</i> , <i>Saxifraga granulata</i> type, <i>Saxifraga hirculus</i> type, <i>Saxifraga oppositifolia</i> , <i>Saxifraga oppositifolia</i> type, <i>Saxifraga paniculata</i> type, <i>Saxifraga stellaris</i> , <i>Saxifraga stellaris</i> type, <i>Saxifraga tricuspidata</i> , Saxifragaceae                                                                                                                                                           |
| Scrophulariaceae         | <i>Antirrhinum</i> type, <i>Antirrhinum</i> / <i>Linaria</i> , <i>Digitalis</i> , <i>Digitalis purpurea</i> type, <i>Digitalis</i> type, <i>Euphrasia</i> , <i>Euphrasia</i> type, <i>Linaria</i> , <i>Linaria</i> type, <i>Melampyrum</i> , <i>Pedicularis</i> , <i>Pedicularis oederi</i> type, <i>Pedicularis palustris</i> type, <i>Pedicularis</i> type, <i>Pedicularis verticillata</i> type, <i>Rhinanthus</i> , <i>Rhinanthus</i> type, <i>Scrophularia</i> , <i>Scrophularia</i> type, <i>Scrophularia/Verbascum</i> , <i>Scrophularia/Verbascum</i> type, <i>Scrophularia/Verbascum/Digitalis</i> , Scrophulariaceae, <i>Verbascum</i> , <i>Verbascum</i> type, <i>Veronica</i> , <i>Veronica</i> type |
| <i>Smilax</i>            | <i>Smilax</i>                                                                                                                                                                                                                                                                                                                                                                                                                                                                                                                                                                                                                                                                                                    |
| Solanaceae               | <i>Capsicum</i> type, <i>Datura</i> , <i>Hyoscyamus</i> , <i>Lycium</i> , <i>Solanaceae</i> , <i>Solanum</i> , <i>Solanum dulcamara</i> , <i>Solanum nigrum</i> , <i>Solanum nigrum</i> type                                                                                                                                                                                                                                                                                                                                                                                                                                                                                                                     |
| <i>Sorbus</i>            | <i>Sorbus</i> , <i>Sorbus aria</i> , <i>Sorbus aucuparia</i> , <i>Sorbus aucuparia</i> type, <i>Sorbus</i> type                                                                                                                                                                                                                                                                                                                                                                                                                                                                                                                                                                                                  |
| Staphyleaceae            | <i>Staphylea</i> , <i>Staphylea pinnata</i>                                                                                                                                                                                                                                                                                                                                                                                                                                                                                                                                                                                                                                                                      |
| <i>Styrax</i>            | <i>Styrax</i> , <i>Styrax officinalis</i>                                                                                                                                                                                                                                                                                                                                                                                                                                                                                                                                                                                                                                                                        |
| <i>Suaeda</i>            | <i>Suaeda</i> type                                                                                                                                                                                                                                                                                                                                                                                                                                                                                                                                                                                                                                                                                               |
| <i>Syringa</i>           | <i>Syringa</i>                                                                                                                                                                                                                                                                                                                                                                                                                                                                                                                                                                                                                                                                                                   |
| <i>Tamarix</i>           | <i>Tamarix</i>                                                                                                                                                                                                                                                                                                                                                                                                                                                                                                                                                                                                                                                                                                   |
| <i>Taxus</i>             | <i>Taxus</i> , <i>Taxus baccata</i>                                                                                                                                                                                                                                                                                                                                                                                                                                                                                                                                                                                                                                                                              |
| <i>Teucrium</i>          | <i>Teucrium</i> , <i>Teucrium</i> type                                                                                                                                                                                                                                                                                                                                                                                                                                                                                                                                                                                                                                                                           |
| <i>Thalictrum</i>        | <i>Thalictrum</i> , <i>Thalictrum alpinum</i> , <i>Thalictrum aquilegiifolium</i> , <i>Thalictrum flavum</i> type, <i>Thalictrum lucidum</i> , <i>Thalictrum</i> type                                                                                                                                                                                                                                                                                                                                                                                                                                                                                                                                            |
| Thymelaeaceae            | <i>Thymelaea</i> , Thymelaeaceae                                                                                                                                                                                                                                                                                                                                                                                                                                                                                                                                                                                                                                                                                 |
| <i>Tilia</i>             | <i>Tilia</i> , <i>Tilia cordata</i> , <i>Tilia cordata</i> type, <i>Tilia dasystyla</i> , <i>Tilia platyphyllos</i> , <i>Tilia platyphyllos</i> type                                                                                                                                                                                                                                                                                                                                                                                                                                                                                                                                                             |
| <i>Tofieldia</i>         | <i>Tofieldia</i>                                                                                                                                                                                                                                                                                                                                                                                                                                                                                                                                                                                                                                                                                                 |
| <i>Trollius</i>          | <i>Trollius</i> , <i>Trollius europaeus</i> , <i>Trollius</i> type                                                                                                                                                                                                                                                                                                                                                                                                                                                                                                                                                                                                                                               |
| <i>Ulmus</i>             | <i>Ulmus</i> , <i>Ulmus glabra</i> , <i>Ulmus glabra</i> type, <i>Ulmus minor</i>                                                                                                                                                                                                                                                                                                                                                                                                                                                                                                                                                                                                                                |
| <i>Ulmus/Zelkova</i>     | <i>Ulmus/Zelkova</i> , <i>Zelkova</i> , <i>Zelkova</i> type                                                                                                                                                                                                                                                                                                                                                                                                                                                                                                                                                                                                                                                      |

|                  |                                                                                                                                                                                                                                                                                                                   |
|------------------|-------------------------------------------------------------------------------------------------------------------------------------------------------------------------------------------------------------------------------------------------------------------------------------------------------------------|
| Urticaceae       | <i>Parietaria</i> , <i>Parietaria/Urtica</i> , <i>Urtica</i> , <i>Urtica dioica</i> ,<br><i>Urtica dioica</i> type, <i>Urtica pilulifera</i> type, <i>Urtica</i> type,<br><i>Urtica urens</i> , Urticaceae                                                                                                        |
| <i>Vaccinium</i> | <i>Vaccinium</i> , <i>Vaccinium myrtillus</i> , <i>Vaccinium myrtillus</i><br>type, <i>Vaccinium oxycoccos</i> , <i>Vaccinium</i> type,<br><i>Vaccinium/Oxycoccus</i>                                                                                                                                             |
| Valerianaceae    | <i>Centranthus</i> , <i>Valeriana</i> , <i>Valeriana dioica</i> type,<br><i>Valeriana montana</i> type, <i>Valeriana officinalis</i> ,<br><i>Valeriana officinalis</i> type, <i>Valeriana sambucifolia</i> type,<br><i>Valeriana tripteris</i> type, <i>Valeriana</i> type, Valerianaceae,<br><i>Valerianella</i> |
| Verbenaceae      | <i>Verbena</i> , <i>Verbena officinalis</i>                                                                                                                                                                                                                                                                       |
| <i>Viburnum</i>  | <i>Viburnum</i> , <i>Viburnum opulus</i> , <i>Viburnum opulus</i> type,<br><i>Viburnum</i> type                                                                                                                                                                                                                   |
| Violaceae        | <i>Viola</i> , <i>Viola arvensis</i> type, <i>Viola canina</i> type, <i>Viola</i><br><i>odorata</i> type, <i>Viola palustris</i> , <i>Viola palustris</i> type, <i>Viola</i><br><i>tricolor</i> , <i>Viola tricolor</i> type, <i>Viola tricolor/Viola</i><br><i>arvensis</i> , Violaceae                          |
| <i>Viscum</i>    | <i>Viscum</i> , <i>Viscum album</i> , <i>Viscum album</i> type, <i>Viscum</i><br>type                                                                                                                                                                                                                             |
| <i>Vitex</i>     | <i>Vitex</i>                                                                                                                                                                                                                                                                                                      |
| <i>Ziziphus</i>  | <i>Ziziphus</i> type, <i>Zizyphus</i> , <i>Zizyphus lotus</i>                                                                                                                                                                                                                                                     |
| Zygophyllaceae   | <i>Tribulus</i> , <i>Tribulus terrestris</i> , Zygophyllaceae,<br><i>Zygophyllum</i>                                                                                                                                                                                                                              |

---

1110

1111

1112

SI Table 3: The results of randomisation t-test on the leave-one-out cross-validated predictions of the weighted averaging-partial least squares (WA-PLS) regression models for 196 taxa (including Poaceae and Polypodiales). Selected components are marked in bold.

| WA-PLS<br>component    | RMSEP          | r <sup>2</sup> | Maximum<br>bias | p            |
|------------------------|----------------|----------------|-----------------|--------------|
| <b>MTCO</b>            |                |                |                 |              |
| 1                      | 5.308          | 0.624          | 14.205          | 0.001        |
| 2                      | 4.969          | 0.671          | 8.831           | 0.001        |
| 3                      | 4.848          | 0.687          | 8.473           | 0.001        |
| <b>4</b>               | <b>4.821</b>   | <b>0.690</b>   | <b>10.263</b>   | <b>0.018</b> |
| 5                      | 4.830          | 0.689          | 10.467          | 0.659        |
| <b>GDD<sub>0</sub></b> |                |                |                 |              |
| 1                      | 987.264        | 0.600          | 2418.420        | 0.001        |
| 2                      | 928.936        | 0.646          | 2154.084        | 0.001        |
| 3                      | 909.864        | 0.660          | 2037.772        | 0.001        |
| <b>4</b>               | <b>906.829</b> | <b>0.663</b>   | <b>2094.995</b> | <b>0.010</b> |
| 5                      | 907.692        | 0.662          | 2118.818        | 0.750        |
| <b>MI</b>              |                |                |                 |              |
| 1                      | 0.452          | 0.445          | 3.925           | 0.001        |
| 2                      | 0.425          | 0.509          | 3.503           | 0.001        |
| <b>3</b>               | <b>0.421</b>   | <b>0.519</b>   | <b>3.483</b>    | <b>0.001</b> |
| 4                      | 0.420          | 0.520          | 3.553           | 0.225        |

SI Table 4: Reconstructed mean temperature of the coldest month (MTCO, °C), growing degree days above a base level of 0°C (GDD<sub>0</sub>) and moisture index (the ratio of annual precipitation to annual potential evapotranspiration, MI) for each of the samples. We give the depth and age for each sample. For the reconstructions of MI, we give values before and after the [CO<sub>2</sub>] correction.

| Depth (cm) | Age (cal yr BP) | Mean Temperature of the Coldest Month (°C) | Growing Degree Days Above Zero | Original Moisture Index | Corrected Moisture Index |
|------------|-----------------|--------------------------------------------|--------------------------------|-------------------------|--------------------------|
| 40         | 1655.9          | 2.32                                       | 4296                           | 0.54                    | 0.70                     |
| 49         | 2093.5          | 2.33                                       | 4291                           | 0.49                    | 0.65                     |
| 52         | 2239.4          | 3.18                                       | 4528                           | 0.52                    | 0.71                     |
| 55         | 2385.3          | 2.41                                       | 4495                           | 0.52                    | 0.71                     |
| 62         | 2725.7          | 5.13                                       | 4654                           | 0.43                    | 0.65                     |
| 65         | 2871.7          | 6.83                                       | 4853                           | 0.32                    | 0.58                     |
| 67         | 2968.9          | 5.72                                       | 4625                           | 0.47                    | 0.68                     |
| 69         | 3066.1          | 5.94                                       | 4465                           | 0.36                    | 0.55                     |
| 71         | 3163.4          | -0.33                                      | 3238                           | 0.79                    | 0.80                     |
| 74         | 3309.3          | 1.21                                       | 3634                           | 0.69                    | 0.76                     |
| 75         | 3358            | -0.18                                      | 3345                           | 0.76                    | 0.79                     |
| 77         | 3455.3          | 2.24                                       | 3914                           | 0.63                    | 0.74                     |
| 80         | 3601.1          | 1.83                                       | 4019                           | 0.61                    | 0.74                     |
| 85         | 3844.3          | 0.55                                       | 3481                           | 0.72                    | 0.78                     |
| 89         | 4038.9          | 0.72                                       | 3572                           | 0.66                    | 0.73                     |
| 90         | 4087.5          | 0.68                                       | 3480                           | 0.70                    | 0.76                     |
| 93         | 4233.3          | 1.75                                       | 3481                           | 0.69                    | 0.75                     |
| 97         | 4427.9          | 0.14                                       | 3134                           | 0.86                    | 0.87                     |
| 99         | 4525.1          | 0.49                                       | 3784                           | 0.58                    | 0.69                     |
| 112        | 5157.3          | 2.68                                       | 4198                           | 0.49                    | 0.66                     |
| 114        | 5254.5          | 3.66                                       | 4203                           | 0.53                    | 0.70                     |
| 116        | 5351.9          | 4.68                                       | 4664                           | 0.44                    | 0.69                     |
| 119        | 5497.7          | 2.52                                       | 3872                           | 0.65                    | 0.78                     |
| 127        | 5886.7          | 2.04                                       | 3932                           | 0.61                    | 0.75                     |
| 128        | 5935.4          | 2.61                                       | 4246                           | 0.55                    | 0.74                     |
| 129        | 5984.1          | 2.93                                       | 4335                           | 0.56                    | 0.76                     |
| 139        | 6470.4          | 1.76                                       | 4189                           | 0.58                    | 0.76                     |
| 141        | 6567.6          | 1.65                                       | 4067                           | 0.64                    | 0.81                     |
| 144        | 6713.5          | 0.79                                       | 3881                           | 0.66                    | 0.81                     |
| 146        | 6810.9          | 1.37                                       | 3537                           | 0.67                    | 0.77                     |
| 150        | 7005.4          | 1.58                                       | 3781                           | 0.60                    | 0.73                     |
| 152        | 7102.6          | 1.70                                       | 3644                           | 0.69                    | 0.80                     |
| 154        | 7199.9          | 2.98                                       | 3966                           | 0.73                    | 0.89                     |
| 157        | 7345.8          | 1.94                                       | 4061                           | 0.56                    | 0.73                     |



|     |         |       |      |      |      |
|-----|---------|-------|------|------|------|
| 160 | 7491.9  | 3.68  | 4221 | 0.58 | 0.78 |
| 163 | 7637.8  | 0.09  | 3348 | 0.80 | 0.87 |
| 166 | 7783.9  | -0.43 | 3239 | 0.74 | 0.79 |
| 168 | 7881.1  | -0.65 | 3203 | 0.81 | 0.86 |
| 171 | 8027.1  | -1.03 | 2876 | 0.88 | 0.87 |
| 173 | 8124.3  | -0.97 | 2946 | 0.86 | 0.86 |
| 174 | 8173    | -1.10 | 3381 | 0.65 | 0.72 |
| 177 | 8319    | 0.52  | 3634 | 0.54 | 0.65 |
| 182 | 8562.3  | -0.23 | 3696 | 0.58 | 0.70 |
| 184 | 8659.5  | -1.36 | 3589 | 0.57 | 0.67 |
| 188 | 8854.2  | 0.03  | 2843 | 0.91 | 0.90 |
| 195 | 9194.8  | 0.73  | 4623 | 0.30 | 0.56 |
| 198 | 9340.7  | 1.06  | 5052 | 0.16 | 0.49 |
| 199 | 9389.3  | 0.69  | 4779 | 0.21 | 0.50 |
| 200 | 9437.9  | 1.21  | 4486 | 0.40 | 0.63 |
| 202 | 9535.1  | -0.31 | 4767 | 0.27 | 0.55 |
| 203 | 9583.8  | 0.30  | 4572 | 0.34 | 0.58 |
| 205 | 9681    | 2.15  | 5007 | 0.27 | 0.58 |
| 208 | 9827    | 1.42  | 4878 | 0.31 | 0.59 |
| 211 | 9973.1  | -1.52 | 3159 | 0.82 | 0.84 |
| 213 | 10070.4 | 1.79  | 4741 | 0.36 | 0.62 |
| 216 | 10216   | -0.21 | 3499 | 0.73 | 0.80 |
| 219 | 10361.9 | 3.16  | 4984 | 0.33 | 0.62 |
| 222 | 10507.8 | -0.75 | 3424 | 0.74 | 0.80 |
| 225 | 10653.8 | 1.71  | 4886 | 0.32 | 0.61 |
| 227 | 10751   | 0.96  | 3607 | 0.76 | 0.86 |
| 229 | 10848.1 | -0.47 | 4368 | 0.39 | 0.60 |
| 231 | 10945.4 | -1.15 | 2942 | 1.02 | 1.01 |
| 235 | 11140   | -1.45 | 2967 | 0.98 | 0.97 |
| 237 | 11237.4 | -2.14 | 2723 | 1.03 | 0.98 |
| 240 | 11383.4 | 0.35  | 3213 | 1.02 | 1.06 |
| 242 | 11480.7 | -1.53 | 2649 | 1.17 | 1.11 |
| 244 | 11577.7 | -1.02 | 3421 | 0.81 | 0.89 |
| 246 | 11675   | -0.60 | 2921 | 1.12 | 1.14 |
| 249 | 11820.9 | -1.43 | 2807 | 1.06 | 1.05 |
| 252 | 11966.7 | -1.75 | 3294 | 0.83 | 0.90 |
| 254 | 12064   | -1.41 | 3414 | 0.89 | 0.99 |
| 259 | 12307.3 | -2.14 | 2439 | 1.32 | 1.26 |
| 261 | 12404.3 | -1.67 | 2702 | 1.16 | 1.17 |
| 264 | 12504.6 | -2.47 | 2426 | 1.26 | 1.21 |
| 267 | 12605.1 | -2.21 | 2288 | 1.35 | 1.29 |
| 269 | 12672.1 | -1.81 | 2886 | 0.99 | 1.03 |
| 274 | 12839.2 | -1.63 | 3094 | 0.98 | 1.06 |

|      |         |       |      |      |      |
|------|---------|-------|------|------|------|
| 279  | 13006.4 | -0.79 | 3459 | 0.79 | 0.94 |
| 281  | 13073.4 | -2.12 | 2269 | 1.36 | 1.31 |
| 288  | 13307.2 | -1.11 | 3601 | 0.71 | 0.88 |
| 290  | 13374.3 | -0.84 | 3720 | 0.64 | 0.82 |
| 291  | 13407.8 | -1.42 | 2649 | 1.24 | 1.27 |
| 293  | 13474.6 | -0.66 | 3895 | 0.67 | 0.89 |
| 296  | 13575   | -1.98 | 2415 | 1.36 | 1.34 |
| 299  | 13675.2 | -0.67 | 3522 | 0.79 | 0.95 |
| 303  | 13809.1 | -1.98 | 2235 | 1.42 | 1.37 |
| 306  | 13909.1 | -1.12 | 2631 | 1.29 | 1.32 |
| 308  | 13976.1 | -0.78 | 3636 | 0.69 | 0.86 |
| 311  | 14076.5 | -1.66 | 2693 | 1.16 | 1.19 |
| 316  | 14243.7 | -1.81 | 2354 | 1.40 | 1.37 |
| 321  | 14410.8 | -1.44 | 2747 | 1.23 | 1.28 |
| 326  | 14577.8 | -1.81 | 2606 | 1.26 | 1.29 |
| 332  | 14778.5 | -2.09 | 2365 | 1.39 | 1.39 |
| 335  | 14878.8 | -1.69 | 2531 | 1.30 | 1.33 |
| 339  | 15012.4 | -1.14 | 2619 | 1.20 | 1.26 |
| 340  | 15046   | -1.33 | 2536 | 1.30 | 1.35 |
| 366  | 15917.7 | -1.93 | 2566 | 1.24 | 1.32 |
| 371  | 16085   | 0.80  | 4274 | 0.59 | 0.92 |
| 581  | 22327.5 | 0.20  | 3084 | 1.02 | 1.32 |
| 604  | 22836.3 | -1.09 | 3221 | 0.83 | 1.13 |
| 643  | 23698   | -1.66 | 2599 | 1.20 | 1.43 |
| 666  | 24206.4 | -1.16 | 3188 | 0.84 | 1.15 |
| 728  | 25577.7 | -0.79 | 3857 | 0.54 | 0.92 |
| 731  | 25644.2 | 1.68  | 4531 | 0.47 | 0.96 |
| 751  | 26087   | 3.65  | 5396 | 0.28 | 0.89 |
| 759  | 26264.1 | 3.29  | 5168 | 0.32 | 0.90 |
| 770  | 26414.2 | 1.19  | 4703 | 0.37 | 0.88 |
| 811  | 26897   | 1.66  | 4765 | 0.37 | 0.89 |
| 823  | 27038.9 | 1.86  | 4939 | 0.32 | 0.87 |
| 867  | 27558.3 | 1.47  | 4457 | 0.49 | 0.96 |
| 894  | 27876.4 | 0.06  | 4145 | 0.51 | 0.94 |
| 905  | 28006.3 | 2.72  | 4943 | 0.39 | 0.92 |
| 911  | 28076.8 | -0.05 | 4028 | 0.55 | 0.96 |
| 919  | 28171   | -0.42 | 4236 | 0.45 | 0.89 |
| 957  | 28618.7 | 1.37  | 4624 | 0.41 | 0.90 |
| 967  | 28736.5 | 0.08  | 4330 | 0.44 | 0.89 |
| 1019 | 29301.3 | 0.89  | 4430 | 0.45 | 0.91 |
| 1117 | 29877   | 2.02  | 4564 | 0.47 | 0.95 |
| 1141 | 30017.8 | -0.63 | 3758 | 0.59 | 0.96 |
| 1153 | 30087.9 | -2.44 | 3572 | 0.70 | 1.02 |

|      |         |       |      |      |      |
|------|---------|-------|------|------|------|
| 1177 | 30227.7 | -0.28 | 4182 | 0.49 | 0.91 |
| 1201 | 30367.4 | 0.25  | 4638 | 0.32 | 0.81 |
| 1211 | 30426.1 | -0.04 | 4219 | 0.49 | 0.92 |
| 1223 | 30495.4 | -0.33 | 3984 | 0.63 | 1.03 |
| 1233 | 30554.7 | 0.98  | 4227 | 0.61 | 1.05 |
| 1235 | 30566.5 | 0.00  | 4278 | 0.54 | 0.98 |
| 1245 | 30624.2 | 0.24  | 4279 | 0.54 | 0.98 |
| 1253 | 30671.2 | 1.18  | 4125 | 0.57 | 0.98 |
| 1263 | 30768.4 | 0.94  | 4310 | 0.51 | 0.95 |
| 1268 | 30896.8 | -1.82 | 4546 | 0.33 | 0.80 |
| 1280 | 31202.7 | 1.70  | 4273 | 0.58 | 1.02 |
| 1540 | 37481.6 | -3.22 | 3695 | 0.53 | 0.80 |
| 1546 | 37550.9 | -3.26 | 3958 | 0.43 | 0.73 |
| 1603 | 38201.9 | 2.04  | 5181 | 0.24 | 0.76 |
| 1613 | 38313.3 | 0.32  | 4872 | 0.24 | 0.72 |
| 1624 | 38432.8 | 0.16  | 5031 | 0.16 | 0.67 |
| 1626 | 38457.9 | 0.50  | 4779 | 0.29 | 0.75 |
| 1632 | 38522.7 | 1.24  | 5298 | 0.14 | 0.69 |
| 1643 | 38643   | 0.24  | 5017 | 0.17 | 0.68 |
| 1653 | 38755.5 | 1.28  | 5303 | 0.13 | 0.68 |
| 1659 | 38822.4 | 2.16  | 5447 | 0.13 | 0.70 |
| 1666 | 38898.8 | 2.61  | 5388 | 0.16 | 0.73 |
| 1683 | 39088.6 | 4.13  | 5325 | 0.38 | 0.91 |
| 1766 | 40010.6 | -1.16 | 4675 | 0.22 | 0.69 |
| 1777 | 40128.3 | -2.00 | 4732 | 0.22 | 0.69 |
| 1785 | 40213.5 | 2.35  | 5305 | 0.23 | 0.79 |
| 1796 | 40328.2 | 0.43  | 4561 | 0.38 | 0.82 |
| 2038 | 43112.3 | 1.84  | 4588 | 0.48 | 0.90 |
| 2501 | 50103.4 | 1.86  | 4626 | 0.50 | 0.91 |
| 2516 | 50327.5 | 1.22  | 4414 | 0.52 | 0.90 |
| 2527 | 50494.6 | 0.72  | 4275 | 0.56 | 0.92 |
| 2537 | 50644.9 | 0.96  | 4163 | 0.58 | 0.92 |
| 2547 | 50794.7 | 0.40  | 4211 | 0.53 | 0.87 |
| 2564 | 51054.1 | 0.85  | 4381 | 0.48 | 0.85 |
| 2621 | 51917.3 | 2.53  | 4784 | 0.44 | 0.86 |
| 2630 | 52051.3 | -0.20 | 3822 | 0.64 | 0.93 |
| 2724 | 53474.9 | -0.59 | 3636 | 0.68 | 0.94 |
| 2753 | 53907.5 | 3.72  | 5175 | 0.38 | 0.86 |
| 2790 | 54566.8 | 2.35  | 4872 | 0.43 | 0.86 |
| 2924 | 57094.6 | 0.23  | 4142 | 0.53 | 0.86 |
| 2961 | 57790.9 | -0.03 | 3209 | 1.09 | 1.31 |
| 2987 | 58278.8 | 0.76  | 3950 | 0.72 | 1.02 |
| 3003 | 58577.4 | 2.96  | 4819 | 0.42 | 0.85 |

|      |         |       |      |      |      |
|------|---------|-------|------|------|------|
| 3005 | 58615.8 | 0.26  | 3705 | 0.75 | 1.02 |
| 3079 | 60003.3 | 1.85  | 3527 | 0.85 | 1.11 |
| 3185 | 61978.6 | 2.00  | 3743 | 0.72 | 1.01 |
| 3319 | 64182.3 | 2.50  | 4358 | 0.53 | 0.91 |
| 3460 | 66099.6 | 2.22  | 4290 | 0.47 | 0.83 |
| 3511 | 66764.1 | -0.23 | 4126 | 0.48 | 0.81 |
| 3522 | 66916.3 | 1.81  | 3987 | 0.60 | 0.91 |
| 3538 | 67125.4 | -0.92 | 3303 | 0.70 | 0.90 |
| 3558 | 67390.9 | -0.93 | 3302 | 0.71 | 0.92 |
| 3567 | 67520   | -0.23 | 3588 | 0.63 | 0.88 |
| 3587 | 67794.3 | 0.81  | 3851 | 0.55 | 0.84 |
| 3595 | 67904.8 | 1.99  | 4227 | 0.52 | 0.86 |
| 3604 | 68027.8 | -0.91 | 3441 | 0.67 | 0.90 |
| 3616 | 68193.9 | 1.96  | 4189 | 0.53 | 0.87 |
| 3675 | 69007.2 | 1.30  | 3898 | 0.54 | 0.83 |
| 3685 | 69145.4 | -0.43 | 3701 | 0.58 | 0.84 |
| 3705 | 69417.4 | 0.02  | 3725 | 0.60 | 0.86 |
| 3725 | 69696.6 | 1.51  | 3776 | 0.62 | 0.89 |
| 3754 | 70097.5 | 2.36  | 4185 | 0.56 | 0.89 |
| 3779 | 70400.9 | 3.96  | 3554 | 1.14 | 1.41 |
| 3799 | 70623   | 2.10  | 3833 | 0.67 | 0.94 |
| 3819 | 70849.2 | 2.20  | 3698 | 0.74 | 1.00 |
| 3837 | 71044.4 | 0.94  | 3561 | 0.71 | 0.94 |
| 3858 | 71279.3 | 0.91  | 3516 | 0.79 | 1.02 |
| 3868 | 71393   | 0.60  | 3591 | 0.72 | 0.96 |
| 3894 | 71680.6 | -0.91 | 3221 | 0.79 | 0.96 |
| 3916 | 71931   | 0.62  | 3606 | 0.71 | 0.95 |
| 4007 | 72956.6 | 3.77  | 3942 | 0.96 | 1.25 |
| 4016 | 73060.4 | -2.17 | 3423 | 0.74 | 0.91 |
| 4027 | 73179.3 | 1.34  | 3899 | 0.74 | 1.01 |
| 4033 | 73247.8 | 1.08  | 3632 | 0.93 | 1.16 |
| 4043 | 73356.3 | 1.56  | 4511 | 0.47 | 0.82 |
| 4051 | 73444.2 | 0.07  | 3809 | 0.63 | 0.88 |
| 4063 | 73581.4 | 1.91  | 4236 | 0.60 | 0.90 |
| 4077 | 73736.8 | -1.21 | 2691 | 1.26 | 1.35 |
| 4085 | 73826.7 | 2.33  | 4138 | 0.68 | 0.97 |
| 4093 | 73915   | -4.08 | 2455 | 1.28 | 1.28 |
| 4098 | 73970.2 | 1.96  | 4381 | 0.65 | 0.98 |
| 4105 | 74049.2 | -4.06 | 2618 | 1.20 | 1.23 |
| 4114 | 74151   | 0.87  | 3111 | 1.24 | 1.40 |
| 4130 | 74327.6 | 1.35  | 3623 | 0.84 | 1.06 |
| 4146 | 74502.5 | 1.54  | 3556 | 0.97 | 1.19 |
| 4165 | 74714.2 | -1.57 | 3717 | 0.59 | 0.81 |

|      |          |       |      |      |      |
|------|----------|-------|------|------|------|
| 4172 | 74796    | 1.69  | 4326 | 0.50 | 0.81 |
| 4192 | 75018.3  | -1.95 | 3925 | 0.53 | 0.77 |
| 4213 | 75239.4  | -0.48 | 4090 | 0.57 | 0.84 |
| 4223 | 75345.2  | -0.57 | 3531 | 0.73 | 0.93 |
| 4246 | 75588.4  | 1.12  | 4861 | 0.28 | 0.67 |
| 4267 | 75805    | -3.34 | 4359 | 0.29 | 0.59 |
| 4287 | 76022.3  | -1.48 | 4393 | 0.36 | 0.67 |
| 4321 | 76388.6  | -0.71 | 3898 | 0.61 | 0.85 |
| 4331 | 76495.4  | -0.79 | 3679 | 0.70 | 0.91 |
| 4424 | 77497.2  | 0.95  | 4215 | 0.52 | 0.80 |
| 4444 | 77713.4  | 2.67  | 4814 | 0.45 | 0.82 |
| 4466 | 77950.7  | -0.53 | 3596 | 0.74 | 0.93 |
| 4484 | 78145.2  | 0.07  | 4118 | 0.52 | 0.78 |
| 4514 | 78468.6  | 1.47  | 3573 | 0.77 | 0.96 |
| 4529 | 78624.9  | -0.65 | 2762 | 1.12 | 1.19 |
| 4539 | 78728.2  | -0.68 | 2937 | 1.02 | 1.12 |
| 4612 | 79501.5  | -0.58 | 4079 | 0.58 | 0.84 |
| 4632 | 79708    | 1.37  | 4152 | 0.63 | 0.90 |
| 4652 | 79925.7  | 0.04  | 4314 | 0.46 | 0.75 |
| 4726 | 80714.2  | 3.08  | 4173 | 0.66 | 0.93 |
| 4765 | 81138.2  | 5.68  | 5509 | 0.30 | 0.77 |
| 4785 | 81358.7  | 1.73  | 4097 | 0.56 | 0.82 |
| 4809 | 81623.3  | 3.37  | 3899 | 0.92 | 1.16 |
| 4828 | 81835    | -0.53 | 3458 | 0.74 | 0.90 |
| 4924 | 82893.5  | 0.46  | 3684 | 0.74 | 0.94 |
| 5004 | 83775.9  | 2.19  | 3771 | 0.89 | 1.11 |
| 5063 | 84990.7  | -1.17 | 3193 | 1.03 | 1.16 |
| 5120 | 86230.5  | 3.64  | 4164 | 0.80 | 1.07 |
| 5161 | 87105.7  | 0.53  | 3784 | 0.68 | 0.89 |
| 5198 | 87895.4  | 2.96  | 4015 | 0.72 | 0.96 |
| 5430 | 93808.8  | 1.55  | 4030 | 0.64 | 0.89 |
| 5473 | 94979.1  | 2.84  | 3639 | 1.00 | 1.20 |
| 5500 | 95716.6  | 1.94  | 3867 | 0.91 | 1.14 |
| 5518 | 96188    | 2.88  | 4135 | 0.89 | 1.16 |
| 5586 | 98027.5  | -3.24 | 3011 | 1.04 | 1.10 |
| 5611 | 98709.7  | 2.21  | 3885 | 0.84 | 1.06 |
| 5657 | 99962.7  | 0.22  | 3781 | 0.71 | 0.90 |
| 5675 | 100449.4 | 1.46  | 4113 | 0.66 | 0.89 |
| 5692 | 100904.9 | 1.14  | 3994 | 0.67 | 0.89 |
| 5724 | 101773.9 | 0.61  | 4567 | 0.37 | 0.67 |
| 5741 | 102241.3 | -1.09 | 4108 | 0.45 | 0.68 |
| 5750 | 102482.3 | 0.25  | 4230 | 0.53 | 0.77 |
| 5768 | 102962.7 | 1.60  | 4152 | 0.66 | 0.89 |

|      |          |       |      |      |      |
|------|----------|-------|------|------|------|
| 5871 | 105756.1 | 0.98  | 4641 | 0.41 | 0.71 |
| 5936 | 107516.1 | 1.90  | 4210 | 0.66 | 0.87 |
| 5951 | 107923.1 | 1.98  | 4143 | 0.73 | 0.94 |
| 5979 | 108683.1 | 2.30  | 4279 | 0.64 | 0.85 |
| 6020 | 109721.8 | 0.78  | 3807 | 0.75 | 0.89 |
| 6035 | 110046   | 1.48  | 4454 | 0.53 | 0.76 |
| 6051 | 110410.7 | 1.91  | 4563 | 0.49 | 0.74 |
| 6066 | 110749   | 1.60  | 4490 | 0.48 | 0.71 |
| 6096 | 111417.7 | 1.25  | 3921 | 0.77 | 0.92 |
| 6126 | 112079.2 | 2.70  | 4032 | 0.62 | 0.77 |
| 6143 | 112458.6 | 1.02  | 3776 | 0.78 | 0.91 |
| 6175 | 113175.1 | 1.37  | 3957 | 0.63 | 0.77 |
| 6190 | 113513   | 1.03  | 3897 | 0.73 | 0.86 |
| 6206 | 113866.9 | 1.00  | 3999 | 0.71 | 0.86 |
| 6230 | 114396.6 | 2.22  | 3985 | 0.91 | 1.06 |
| 6260 | 115062.8 | 0.59  | 4593 | 0.39 | 0.62 |
| 6296 | 115781.1 | 0.52  | 3632 | 0.80 | 0.89 |
| 6312 | 116113.1 | -0.44 | 3238 | 0.92 | 0.95 |
| 6342 | 116716.3 | 2.88  | 3886 | 0.91 | 1.05 |
| 6380 | 117485.2 | 0.12  | 4133 | 0.51 | 0.67 |
| 6419 | 118271.7 | 1.85  | 4559 | 0.43 | 0.66 |
| 6443 | 118760.7 | -0.19 | 4140 | 0.48 | 0.64 |
| 6482 | 119547.2 | 0.48  | 3794 | 0.77 | 0.89 |
| 6515 | 120190.6 | 1.14  | 4525 | 0.51 | 0.73 |
| 6553 | 120787   | 1.05  | 4566 | 0.47 | 0.69 |
| 6606 | 121607.2 | -0.14 | 3995 | 0.62 | 0.77 |
| 6649 | 122274.4 | 2.57  | 4498 | 0.66 | 0.87 |
| 6675 | 122671.2 | 2.95  | 3956 | 0.93 | 1.08 |
| 6693 | 122942.9 | 0.91  | 4494 | 0.48 | 0.70 |
| 6711 | 123213.8 | 0.50  | 4224 | 0.55 | 0.73 |
| 6721 | 123363.9 | 3.41  | 4294 | 0.73 | 0.92 |
| 6735 | 123573.2 | -0.81 | 4559 | 0.22 | 0.47 |
| 6827 | 124848.8 | 3.32  | 4448 | 0.68 | 0.90 |
| 6847 | 125110   | 3.04  | 4721 | 0.53 | 0.79 |
| 6854 | 125205.7 | 2.60  | 4091 | 0.77 | 0.95 |
| 6874 | 125476.3 | 3.84  | 4662 | 0.63 | 0.88 |
| 6897 | 125785.6 | 1.02  | 4244 | 0.62 | 0.82 |
| 6911 | 125975.8 | 2.17  | 4032 | 0.88 | 1.06 |
| 6912 | 125989.1 | 2.33  | 4568 | 0.54 | 0.79 |
| 6923 | 126136.8 | 0.27  | 4026 | 0.67 | 0.84 |
| 6935 | 126303.9 | 2.56  | 4481 | 0.59 | 0.83 |
| 6942 | 126390.5 | 2.03  | 4401 | 0.57 | 0.79 |
| 6946 | 126448.8 | 2.31  | 4426 | 0.53 | 0.75 |

|      |          |       |      |      |      |
|------|----------|-------|------|------|------|
| 6961 | 126654   | 1.25  | 4162 | 0.65 | 0.84 |
| 6964 | 126690.4 | 2.67  | 4647 | 0.55 | 0.81 |
| 6968 | 126747.1 | 1.53  | 4535 | 0.47 | 0.71 |
| 6982 | 126937   | -0.64 | 4216 | 0.46 | 0.65 |
| 6985 | 126980.1 | 2.81  | 4568 | 0.45 | 0.70 |
| 6991 | 127060.4 | 4.57  | 5406 | 0.33 | 0.70 |
| 7006 | 127265.1 | 5.10  | 5725 | 0.24 | 0.67 |
| 7021 | 127457.6 | 3.51  | 5255 | 0.34 | 0.69 |
| 7025 | 127505.4 | 2.97  | 5127 | 0.36 | 0.69 |
| 7028 | 127541.7 | 3.47  | 5403 | 0.26 | 0.64 |
| 7029 | 127553.3 | 4.17  | 5223 | 0.36 | 0.71 |
| 7039 | 127678.4 | 4.39  | 4558 | 0.69 | 0.95 |
| 7050 | 127814.3 | 3.75  | 4648 | 0.60 | 0.87 |
| 7067 | 128021   | 1.57  | 4314 | 0.60 | 0.81 |
| 7071 | 128071.6 | 2.85  | 4226 | 0.73 | 0.94 |
| 7075 | 128117.9 | 2.44  | 3973 | 0.85 | 1.03 |
| 7082 | 128204   | 2.17  | 3931 | 0.87 | 1.04 |
| 7086 | 128253.7 | 1.88  | 4408 | 0.57 | 0.81 |
| 7093 | 128341.2 | 1.87  | 4357 | 0.62 | 0.84 |
| 7097 | 128392.1 | 5.43  | 5627 | 0.34 | 0.75 |
| 7132 | 128828.1 | 1.01  | 4281 | 0.48 | 0.70 |
| 7142 | 128949.6 | 1.92  | 4381 | 0.56 | 0.79 |
| 7147 | 129007.1 | 2.01  | 4652 | 0.48 | 0.75 |
| 7152 | 129070.4 | 3.31  | 4609 | 0.59 | 0.85 |
| 7163 | 129202.7 | 3.44  | 4386 | 0.67 | 0.90 |
| 7173 | 129328.7 | 1.23  | 4427 | 0.53 | 0.78 |
| 7178 | 129389.1 | 1.93  | 3920 | 0.85 | 1.03 |
| 7185 | 129476.1 | 2.56  | 4237 | 0.80 | 1.02 |
| 7189 | 129526.9 | 2.30  | 3885 | 0.83 | 1.00 |
| 7214 | 129828.4 | 0.94  | 4052 | 0.64 | 0.83 |
| 7224 | 129954.4 | 0.09  | 3689 | 0.82 | 0.97 |
| 7234 | 130075.3 | 0.23  | 3784 | 0.75 | 0.91 |
| 7245 | 130212.2 | 3.75  | 4165 | 0.92 | 1.14 |
| 7259 | 130382.3 | 1.52  | 3954 | 0.75 | 0.94 |
| 7264 | 130454.1 | 3.52  | 4269 | 0.71 | 0.94 |
| 7295 | 130909.1 | 2.14  | 4166 | 0.79 | 1.01 |
| 7304 | 131044   | 1.68  | 4058 | 0.72 | 0.92 |
| 7309 | 131118.7 | 3.26  | 4004 | 0.89 | 1.09 |
| 7314 | 131192.4 | 1.03  | 3949 | 0.76 | 0.95 |
| 7319 | 131270.6 | 3.37  | 4519 | 0.65 | 0.92 |

1127  
1128  
1129

SI Table 5: Definition of the Marine Isotope Stages (and sub-stages) boundaries used in our analyses.

| Age (ka)          | Marine Isotope Stage | Source                   |
|-------------------|----------------------|--------------------------|
| 132.7 - 130       | MIS 6                | Lisiecki and Raymo, 2005 |
| 130 - 71          | MIS 5                | Martrat et al., 2004     |
| 127 - 112         | MIS 5e               | Rasmussen et al., 2014   |
| 112 - 109         | MIS 5d               |                          |
| 109 - 94          | MIS 5c               |                          |
| 94 - 86           | MIS 5b               |                          |
| 86 - 71           | MIS 5a               |                          |
| 71 - 57           | MIS 4                |                          |
| 57 - 29           | MIS 3                |                          |
| 29 - 14           | MIS 2                |                          |
| 14 - present time | MIS 1                |                          |
