# Supplementary material for: Climate changes in interior semi-arid Spain from the last interglacial to the late Holocene
Source: Copernicus journal article supplement (doi:10.5194/cp-2019-16), 2019-02-12
Supplement: Supplementary file 1 [file IPE surface samples_subm_Feb.xlsx]

## Sheet: IPE surface samples
Site Name	Reference	Entity name	Latitude	Longitude	Elevation	Entity Type	Abies	Acer	Alnus	Amaranthaceae	Apiaceae	Arbutus	Aristolochiaceae	Artemisia	Asparagaceae	Asteraceae	Asteroideae	Carduoideae	Cichorioideae	Berberidaceae	Betula	Boraginaceae	Brassicaceae	Buxus	Calluna	Campanulaceae	Caprifoliaceae	Caryophyllaceae	Castanea	Cedrus	Celtis	Ceratonia	Cistaceae	Cistus	Colchicaceae	Convolvulaceae	Cornus	Corylus	Crassulaceae	Cupressaceae	Cyperaceae	Daphne	Ephedra	Equisetum	Ericaceae	Euphorbiaceae	Fabaceae	Fagus	Fraxinus
Marboré	Leunda et al., 2017	MOSS-MAR15-1	42.6762	0.0835833	1282	Moss	1		1	9									4		12	1	5					1										15		24	1		2		1		5		45
Marboré	Leunda et al., 2017	MOS-MAR15-2	42.6774	0.0835	1298	Moss			4	3	1						2				11		1	1											3			35		12	1		1				2	5	11
Marboré	Leunda et al., 2017	MOS-MAR15-3	42.6775	0.0761167	1325	Moss	1		2	8							2	1			49	1	1															25		23					1		3	9
Marboré	Leunda et al., 2017	MOSS-MAR15-4	42.6804	0.0719	1386	Moss			2	3							2		4		61	2						5										18		3			1		3		6	5	4
Marboré	Leunda et al., 2017	MOSS-MAR15-5	42.6835	0.0715167	1462	Moss			1	10											6		1	2														22		7	1						3	1	4
Marboré	Leunda et al., 2017	MOSS-MAR15-6	42.6841	0.0704	1493	Moss				19							1		1		7	1		5														17		22					1		6	8	4
Marboré	Leunda et al., 2017	MOSS-MAR15-7	42.686	0.0665	1585	Moss					6			2			2				5	1						3										31		11					2		4	2	3
Marboré	Leunda et al., 2017	MOSS-MAR15-8	42.6873	0.0617667	1673	Moss	1		1	5	1						3	1			1	1						1										2		17					1		5	1	1
Marboré	Leunda et al., 2017	MOSS-MAR15-9	42.6874	0.0600833	1752	Moss	1		1	7				1			2	1	1		1		2				2	12					2					2		8			1				1
Marboré	Leunda et al., 2017	MOSS-MAR15-10	42.689	0.05995	1850	Moss			3	9	1						5		2		4	3						5										10		7	1	8			1		4		1
Marboré	Leunda et al., 2017	MOSS-MAR15-11	42.6903	0.052	2288	Moss				4								1	2		1		2															1		19	1						5
Marboré	Leunda et al., 2017	MP12	42.6911	0.0362	2601	Moss	5		3	20	2			4			3		6		2		7					1	1									4		5	1				1		2
Marboré	Leunda et al., 2017	MP13	42.6898	0.0387833	2600	Moss			4	24	1			2			4		4				7					2	2									7		4	9				2		3
Marboré	Leunda et al., 2017	MP14	42.6897	0.0370833	2593	Moss	3		1	18				4			3		4		3								3									7		3	3				5		3	1	2
Conquezuela	Aranbarri et al., 2015	CQM-1	41.1928	-2.54	1176	Moss			2	6	1			3			4	5	5		1	1	2					6					3						1	7	10		1			14	9		7
Conquezuela	Aranbarri et al., 2015	CQM-2	41.1906	-2.51667	1155	Moss				8	2			2				6	9		1	6	8				2	1	2				7							6	4		1	1	2	2	19		3
Conquezuela	Aranbarri et al., 2015	CQM-3	41.2331	-2.53028	1158	Moss			5	4	1							8	10			4	7	2			3	4					8					1		20	1		1		2	1	11		3
Conquezuela	Aranbarri et al., 2015	CQM-4	41.2425	-2.56528	1152	Moss			1	1	2	1					1	2				2	5	1				1					1			1			3	2			2		1	1	34		1
Conquezuela	Aranbarri et al., 2015	CQM-5	41.2333	-2.56806	1152	Moss	1		1	4		1		1			1	8	1		2		5				1	1		1			6					1		15	2		4		1	1	16		2
Conquezuela	Aranbarri et al., 2015	CQM-6	41.2156	-2.63333	1233	Moss				5				2				1	1			1	4					1					4					1		4	1				3	1	10
Conquezuela	Aranbarri et al., 2015	CQM-7	41.185	-2.61861	1208	Moss				1		1		1								2	1		1								3					1		2			2		1	1	14		1
Conquezuela	Aranbarri et al., 2015	CQM-8	41.1703	-2.57694	1159	Moss			1	6				2			19	11	3		1		7		1		2	3					6			1				5	12					2	5		1
Conquezuela	Aranbarri et al., 2015	CQM-9	41.1625	-2.59583	1111	Moss			1	6							5	7	1			4	5		1		5						6							10	2			1	1	3	10	1	4
Conquezuela	Aranbarri et al., 2015	CQM-10	41.1847	-2.55889	1168	Moss				4				2			5	4	1		1	2					1	2					9				1	3		5	2			2	2	3	8	2	1
Conquezuela	Aranbarri et al., 2015	CQM-11	41.1667	-2.51806	1163	Moss				5		1		1				2	2				1		1			2					4					3		14	1			3	2		2	1	1
Conquezuela	Aranbarri et al., 2015	CQM-12	41.1372	-2.49417	1154	Moss			2	14		1		1				14			2				2		1	6					12			1		3		13	1		2	1	7	2	13	1	3
Villarquemado	García-Prieto, 2015	TPV-1	40.5446	-1.20319	1152	Tauber pollen trap			1	119	6		1	11		11		3				4	9					3	3				9			2				14	6		3		6	6	52
Villarquemado	García-Prieto, 2015	TPV-2	40.5289	-1.20319	1124	Tauber pollen trap				15	2		1	8		17		1					2					1	1				4					4		9	4				6		3
Villarquemado	García-Prieto, 2015	TPV-3	40.5112	-1.28358	986	Tauber pollen trap			1	654	3			9		63		3					9					3	2				1					3		4	2					2	4
Villarquemado	García-Prieto, 2015	TPV-4	40.5076	-1.29408	990	Tauber pollen trap			5	582	3			15		14		2				6	5					1										5		27	15				6		15
Villarquemado	García-Prieto, 2015	TPV-5	40.5029	-1.34919	1178	Tauber pollen trap				124	2		1	9		75		4				2	5			5		5	1				18					3		25	7		1		1		8		1
Villarquemado	García-Prieto, 2015	TPV-6	40.5012	-1.33747	1098	Tauber pollen trap			3	38	3			6		117		4					5				14	7					4			11		6	2	6	2		1		3		10		1
Villarquemado	García-Prieto, 2015	TPV-7	40.4425	-1.37578	1184	Tauber pollen trap			1	45	2			7		32		1					5										7					3		16	1		2		5	1	10
Villarquemado	García-Prieto, 2015	TPV-8	40.4271	-1.38014	1091	Tauber pollen trap				18	13			17		22							6				3		7							15		1	6	80	3		3		5		74
Villarquemado	García-Prieto, 2015	TPV-9	40.4019	-1.37125	1093	Tauber pollen trap				19	6			97		46		27					15										4			3		1		12	5		1		3		3
Villarquemado	García-Prieto, 2015	TPV-10	40.4125	-1.38675	1144	Tauber pollen trap				13				19		5		2															3			1				8	1		1		2
Villarquemado	García-Prieto, 2015	TPV-11	40.4188	-1.37272	1132	Tauber pollen trap				81	5			13		57		4				2	4										1			1				46	11		4		3	7	9
Villarquemado	García-Prieto, 2015	TPV-12	40.4314	-1.39675	1088	Tauber pollen trap				19				5		54		6				2	16					10					2			2			1	31	6		2		3	1	15
Enol	Rieradevall et al., 2018	PNPE 1 (143.1)	43.3094	-4.9825	410	Moss			6	1	1	2						1			13		1					2	8		1			2				95	1	5	2			1	5	1	8	6	25
Enol	Rieradevall et al., 2018	PNPE 2A (143.2)	43.3219	-5.00361	263	Moss			2		2			1				2	2		24		1					2	18		2			2				93		3				1	3		9	3	2
Enol	Rieradevall et al., 2018	PNPE 2B (143.3)	43.32	-5.00361	263	Moss			11	1		3		1				2	1		14		1	1	2		1		44		1			4				93		2					4		6	4	3
Enol	Rieradevall et al., 2018	PNPE 3 (143.4)	43.3411	-5.02083	178	Moss			5		2	1					1		1		38		2		1				11					3				52	1	2	1				4		2	5	2
Enol	Rieradevall et al., 2018	PNPE 4A (143.5)	43.305	-5.05361	393	Moss		1	3		1	2									7		1		1		1		1					1				102		2	2				6		2	32	2
Enol	Rieradevall et al., 2018	PNPE 4B (143.6)	43.3049	-5.05403	444	Moss		1	2	2		2		1				1			4	1	1		1				2					2				36	2	4	2				8		5	71	3
Enol	Rieradevall et al., 2018	PNPE 4C (143.7)	43.3062	-5.05375	353	Moss			2		1	1									2		4		1		1		6					3				43		2	2				6		5	133	4
Enol	Rieradevall et al., 2018	PNPE 4D (143.8)	43.307	-5.05267	265	Moss		3	4	2	1	1		1				1			11		5				1		10					5				93		5					8	2	4	21	3
Enol	Rieradevall et al., 2018	PNPE 5 (143.9)	43.2924	-5.05817	808	Moss			4	1		1		1				3	1		6		2					1	4					5				58	2	1	1				9		14	17	2
Enol	Rieradevall et al., 2018	PNPE 6 (143.10)	43.2641	-4.99967	1096	Moss			3			4						1			2		1						1					1				22	1	1	2				11		5	132	2
Enol	Rieradevall et al., 2018	PNPE 7A (143.11)	43.2657	-5.01961	973	Moss			6	2		1						1	1		2		2		1				1		2			2				40	1		1				9		2	135
Enol	Rieradevall et al., 2018	PNPE 7B (143.12)	43.2657	-5.02003	967	Moss		1	2	2		3						2	2		6		2		1				2		1			3				38		1					11		5	140	1
Enol	Rieradevall et al., 2018	PNPE 8 (143.13)	43.3537	-5.12336	75	Moss			5	2	1							3	2		6	1	4					2	1					4				38	1	3	1				10	1	5	59	1
Enol	Rieradevall et al., 2018	PNPE 9 (143.14)	43.3498	-5.01856	171	Moss			75	1	1	2			1						13		1		1				3					1				55	1	2					5		2	3	6
Enol	Rieradevall et al., 2018	MPPE 1 (144.1)	43.3536	-5.12367	132	Moss			3		1							2			9	1	2						6					3				50		5					2		2	21	43
Enol	Rieradevall et al., 2018	MPPE 2 (144.2)	43.3309	-5.09686	157	Moss			8			2							3		4		2		2			1						2				51		1	1				5		1	6	4
Enol	Rieradevall et al., 2018	MPPE 3 (144.3)	43.3157	-5.06733	199	Moss		1	5		1	5					2	2			5	1	12		3		1	1	44					4				46	2	1	1				9		3	6	4
Enol	Rieradevall et al., 2018	MPPE 4 (144.4)	43.3021	-5.07567	382	Moss			5	4		1					2	1	1		5		2		5			1	12		1			1				34		5	2				10	2	5	5	2
Enol	Rieradevall et al., 2018	MPPE 5 (144.5)	43.3003	-5.03883	519	Moss			12		4	2		2				1			7		3		1				18					2				80	1	1					8		8	4	10
Enol	Rieradevall et al., 2018	MPPE 7 (144.6)	43.2894	-5.01475	862	Moss				1											5	1	1						2									13	1		1				15		1	14	1
Enol	Rieradevall et al., 2018	MPPE 9 (144.7)	43.2801	-5.00353	992	Moss			3		1						1	6	1		5	1	6		1				2					2				40		2	2				24	4	3	32	3
Enol	Rieradevall et al., 2018	MPPE 10 (144.8)	43.2709	-4.99336	1076	Moss			2	2		2						2	2		4		4		1				8									58	3	1					13		3	64	4
Cova de En Pardo	González-Sampériz, 1999	Cova de En Pardo	38.6678	-0.186111	640	Soil surface		6		17	3			1			18	2	28				64	9				5				1		32		9			10	48			7		16	6	42
Basa de la Mora	Pérez-Sanz, 2014	58-1 BSM10-T1 (Om)	42.5472	0.325833	1917	Moss	1			8									10		2		3			3												1		6	4						5	4	2
Basa de la Mora	Pérez-Sanz, 2014	58-2 BSM10-T3 (20m)	42.5472	0.325556	1910	Moss	2	1		7	1			1			1		2		2		4			2		1					1						1	3							4	2	1
Basa de la Mora	Pérez-Sanz, 2014	58-3 BSM10-T4 (40m)	42.5475	0.325833	1911	Moss	1			13	1			1			1		13		1	1	2			2												1		4	3						5	1
Basa de la Mora	Pérez-Sanz, 2014	58-4 BSM10-T7 (60m)	42.5478	0.325556	1908	Moss			1	8	2			1			1	4			2		6	1																4	1				2		10	4
Basa de la Mora	Pérez-Sanz, 2014	58-5 BSM10-T9 (80m)	42.5478	0.325278	1930	Moss			1	6				2			1	1	5		2		3			2										1		2		1							7	1
Basa de la Mora	Pérez-Sanz, 2014	58-6 BSM10-T11 (100m)	42.5481	0.325278	1917	Moss	1			6				1			2	1	14	1	3		3					1												4	1				1		3	2
Basa de la Mora	Pérez-Sanz, 2014	58-7 BSM10-T13 (300m)	42.5492	0.323611	1911	Moss				4	1			1					15		1		1			2													1	3	1						6	1
Basa de la Mora	Pérez-Sanz, 2014	Basa de la Mora	42.5453	0.3255	1906	modern core top	1			10				2				1		1	2		2	1		1			2				1					2	1	8	2				2		4	1	6
Marboré	Leunda et al., 2017	Marboré	42.6956	0.04002	2584	modern core top	10			34	3			5				5			2			2														8	2		1		2		2		28		1
Estanya	González-Sampériz et al., 2017	Estanya	42.0283	0.52905	677	modern core top				10	1			5				1	1					1												1		1		12	12				4
Taravilla	Moreno et al., 2008	Taravilla	40.651	-1.97435	1126	modern core top				1	1			3			1		3		1		6	14				1										4		8	21				4	1	7
Zoñar	Martín-Puertas et al., 2008	Zoñar	37.4827	-4.69008	300	modern core top				4	3						1	2	4				2																	4	9		1				4
[truncated: 62 more columns]
